# Supplementary material for: Unprecedented inorganic HTL-based MA-free Sn–Pb perovskite photovoltaics with an efficiency over 23%
Source: Royal Society of Chemistry journal article supplement (doi:10.1039/d4ee03579h), 2024-01-01
Supplement: d4ee03579h1.pdf [file d4ee03579h1.pdf]

## Supplementary Materials for

# Unprecedented Inorganic HTL-based MA-free Sn-Pb Perovskite Photovoltaics with an Efficiency over 23%

*Seojun Lee<sup>a</sup>, Jun Ryu<sup>a</sup>, Dong-Gun Lee<sup>a</sup>, Padmini Pandey<sup>b</sup>, Chang-Mok Oh<sup>c</sup>, In-Wook Hwang<sup>c</sup>, SungWon Cho<sup>a</sup>, Saemon Yoon<sup>a</sup>, Jeong-Yeon Lee<sup>a</sup>, and Dong-Won Kang<sup>\*, a, b</sup>*

<sup>a</sup> Department of Smart Cities, Chung-Ang University, 84 Heukseok-ro, Dongjak-gu, Seoul 06974, Republic of Korea.

<sup>b</sup> Department of Energy Systems Engineering, Chung-Ang University, 84 Heukseok-ro, Dongjak-gu, Seoul 06974, Republic of Korea.

<sup>c</sup> Advanced Photonics Research Institute, Gwangju Institute of Science and Technology, Gwangju, Republic of Korea

\* Corresponding Author: Dong-Won Kang ([kangdwn@cau.ac.kr](mailto:kangdwn@cau.ac.kr))

## Experimental section

### Materials

Formamidinium iodide (FAI, Greatcell Solar), *n*-butylammonium iodide (*n*-BAI, Greatcell Solar), Cesium iodide (CsI, 99.999 %, Alfa Aesar), lead(II) iodide (PbI<sub>2</sub>, 99.99 %, Tokyo Chemical Industry Co., Ltd.), tin(II) fluoride (SnF<sub>2</sub>, 99 %, Sigma-Aldrich), Sn powder (99.8%, Sigma-Aldrich), iodine (I<sub>2</sub>, 99.8%, Sigma-Aldrich), and germanium iodide (GeI<sub>2</sub>, 99.8%, Sigma-Aldrich) were purchased and used as precursors for Sn-Pb binary perovskites. Ethane-1,2-diammonium iodide (EDAI<sub>2</sub>, Greatcell Solar) was purchased and used as passivation of Sn-Pb perovskite film surface. Dimethylformamide (DMF, 99.5 %, Samchun Chemical) and dimethyl sulfoxide (DMSO, 99.8 %, Samchun Chemical), toluene (99.8 %, Samchun Chemical), 2-Propanol (IPA, Sigma-Aldrich), and chlorobenzene (CBZ, 99 % - GR grade, Wako) were used as solvents. Acetone ( $\geq 99$  %, Samchun Chemical) and Isopropanol (IPA,  $\geq 99.5$  %, Samchun Chemical) were used as cleaning solvents for Fluorine-doped tin oxide (FTO)-coated glasses. Poly(3,4-ethylenedioxythiophene) polystyrenesulfonate (PEDOT:PSS, PVP AI 4083) was sourced from Clevios™ (Germany). Phenyl-C<sub>61</sub>-butyric acid methyl ester (PC<sub>61</sub>BM, 99.5 %) was sourced from Organic Semiconductor Materials (OSM, Republic of Korea) and Bathocuproin (BCP, 98 %) was purchased from Alfa Aesar. Poly(3-hexylthiophene-2,5-diyl) (P3HT, 4002-EE, Mw = ca. 60 K, RR = ~ 90 %) was purchased from Rieke Metals. Nickel nitrate hexahydrate (Ni(NO<sub>3</sub>)<sub>2</sub>·6H<sub>2</sub>O), aluminum nitrate nonahydrate (Al(NO<sub>3</sub>)<sub>3</sub>·9H<sub>2</sub>O) were purchased from Sigma-Aldrich.

### **Al-NiO<sub>x</sub> nanocrystal (ANO NC) solution synthesis method**

552.8 mg of nickel nitrate hexahydrate and 10 mg of aluminum nitrate nonahydrate was dissolved in 20 ml of deionized water. After fully dissolving them, sodium hydroxide was dropped into the solution until pH 10. The green murky solution was rinsed with deionized water by a centrifuge, and the rinsing was repeated 3 times. The rinsed solution was fully dried at 95 °C. Then, the dried green powder was annealed at 300 °C in the furnace, resulting in obtaining black powder which is aluminum doped nickel oxide. This powder was dispersed in 3:1 ratio of deionized water and IPA with a concentration of 12.5 mg/ml.

### **Preparation of perovskite precursor solution**

#### **1. Preparation of SnI<sub>2</sub> solution**

SnI<sub>2</sub> solution was prepared from Sn + I<sub>2</sub> with 0.8 M concentration. First, 0.8M I<sub>2</sub> was dissolved in DMSO 0.2 mL and stirred for 1 hour. After the stirring, DMF 0.8 mL was added to the I<sub>2</sub> solution dissolved in DMSO and stirred for 10 min. Next, Sn powder of 0.8 M was added to the I<sub>2</sub> solution and stirred for overnight. Then, the SnI<sub>2</sub> solution suitable for the stoichiometric ratio of 1.6 M MA-free Sn-Pb perovskite was completely prepared.

#### **2. Preparation of 1.6 M MA-free Sn-Pb perovskite solution**

A BA<sub>0.02</sub>(FA<sub>0.83</sub>Cs<sub>0.17</sub>)<sub>0.98</sub>Sn<sub>0.5</sub>Pb<sub>0.5</sub>I<sub>3</sub> precursor was prepared from *n*-BAI, FAI, CsI, PbI<sub>2</sub>, with 1.6 M concentration (the stoichiometric ratio of *n*-BAI:FAI:CsI:PbI<sub>2</sub> is 0.83:0.17:0.5:0.5), excess SnF<sub>2</sub> of 0.08 M, Sn powder of 0.056 M, and SnI<sub>2</sub> solution. GeI<sub>2</sub> of 0.04 M is added for with GeI<sub>2</sub> Sn-Pb perovskite. After the preparation of *n*-BAI, FAI, CsI, PbI<sub>2</sub>, SnF<sub>2</sub>, Sn powder, and GeI<sub>2</sub>, the filtered SnI<sub>2</sub> solution of 1.042 mL was added to the prepared bottle. The MA-free Sn-Pb perovskite solution was completely prepared after stirring for 2 hours.

## **Fabrication of MA-free Sn- Pb Perovskite Solar Cells (PSCs) and hole-only devices**

FTO-coated glasses (Asahi) were sequentially cleaned with acetone, and IPA in the ultrasonic bath for 20 min, respectively. After cleaning, the glass substrates were dried in the dry oven at 95 °C to evaporate residual solvents. The cleaned substrates were then subjected to a UV treatment for 30 min. PEDOT:PSS was spin-coated onto the FTO substrates at 6000 rpm for 30 s in ambient conditions and annealed at 150 °C for 20 min on a hotplate as a hole transport layer (HTL) (thickness is ca. 20~30 nm). ANO NC of 50 µL was spin-coated FTO substrates at 1000 rpm for 1 s and 3000 rpm for 30s in ambient condition and annealed at 150 °C for 20 min on a hotplate as an inorganic hole transport layer (HTL) (thickness is ca. 10~20 nm). Then, the HTL-coated substrates were transferred to N<sub>2</sub>-filled glove box. The perovskite precursor solutions with or without GeI<sub>2</sub> were spin-coated at 5000 rpm for total of 35 s (acceleration time: 5 s) in the N<sub>2</sub>-filled glove box. A 300 µL of toluene was applied dropwise in the center of the substrate at 12~13 s during the spin coating. The perovskite-coated substrate was annealed at 65 °C for 1 min and sequentially annealed at 100 °C for 10 min (thickness is ca. 600 nm). For the passivation of the perovskite surface, the EDAl<sub>2</sub> with 0.5 mg/mL dissolved in IPA was spin-coated with a dynamic coating at 5000 rpm for 30 s and annealed at 100 °C for 5 min to remove residual solvent. For an electron transport layer, a PC<sub>61</sub>BM solution with 20 mg/mL dissolved in CBZ was spin-coated onto the perovskite film at 1500 rpm for 35 s and annealed at 75 °C for 10 min. A BCP solution (0.5 mg/mL dissolved in IPA) was spin-coated at 4000 rpm for 20 s without any post-annealing treatment. The silver (Ag) top electrodes (ca. 180 nm) were thermally evaporated under a high vacuum condition ( $< 2 \times 10^{-6}$  Torr) with a shadow mask (the size of each solar cell device is 4 mm<sup>2</sup>).

The hole-only devices for space-charge limited current (SCLC) were fabricated with a structure of FTO/PEDOT:PSS or ANO/perovskite/P3HT/Ag. All fabrication processes were followed

in the same manner with the PSCs except for a P3HT layer. A P3HT solution dissolved in CBZ (10 mg/mL) was spin-coated onto the perovskite film at 3000 rpm for 30s and annealed at 100 °C for 5 min.

## **Characterization**

The optical absorption spectra were characterized using ultraviolet-visible (UV–Vis) spectroscopy (UV-2700, Shimadzu). Before scanning the perovskite samples, a baseline correction was conducted with a scan range of 300 nm – 1100 nm. The measurement conditions are 100 nm/min for the scan speed and 1 nm for the interval step size. The steady-state photoluminescence (PL) spectra were measured using a spectrofluorometer (Fluorolog3 with TCSPC, HORIBA SCIENTIFIC) with a laser excitation wavelength at 463 nm. A crystal structure of the perovskite films was evaluated by X-ray diffraction (XRD, D8-Advance, Bruker-AXS). A diffracted beam monochromator was equipped in the X-ray diffractometer (Cu K $\alpha$  radiation,  $\lambda = 1.541 \text{ \AA}$ ). All the XRD data were recorded in the two-theta range from 10° to 40° with a 1° min<sup>-1</sup> scanning rate at RT. The surface morphologies and cross-sectional images were investigated by field emission scanning electron microscopy (FE-SEM; AURIGA, Carl Zeiss). The roughness of the perovskite films was observed by atomic force microscopy (AFM, NX10 Complete AFM, Park Systems). X-ray photoelectron spectroscopy (XPS) measurement was performed with a K-alpha system (Thermo Fisher Scientific) using a monochromatic Al K $\alpha$  irradiation (1486.6 eV). Ultraviolet photoelectron spectroscopy (UPS) measurement was performed using an XPS-Theta Probe (Thermo Fisher Scientific) with Al K $\alpha$  radiation (1486.6 eV). The steady-state fluorescence spectra were recorded using a Hitachi F-7000 fluorescence spectrophotometer. fs-TAS and decays were recorded using a homemade TA spectrometer combined with a femtosecond Ti:sapphire regenerative amplifier system (Hurricane, Spectra Physics). A pump pulse at 400 nm with a power density of 3  $\mu\text{J}/\text{cm}^2$  was

produced using an optical parametric amplifier (IR-OPA, Spectra Physics) and a neutral density filter, while a broadband white-light continuum probe pulse was generated by focusing a small portion of the 800 nm amplifier output into a sapphire window. TA signals in respective optical delays of pump and probe pulses were collected using an optical fiber coupled with multichannel spectrometers from Ocean Insight (Ocean FX). The contact angle measurement was conducted by pendant drop tensiometer (DSA100, KRUSS).

### **Device testing**

All device characterizations were carried out in ambient conditions (RT and relative humidity (RH) of 25 – 30 %). Current-voltage (J-V) curves of the perovskite solar cells were measured using a solar simulator (PEC-L01, Peccell Technologies) under standard AM 1.5 illumination (power, 100 mW/cm<sup>2</sup>). The maximum power point tracking (MPPT) was measured under 100 mW/cm<sup>2</sup> illumination using LED solar simulator (Newport, LSH-7320). The light intensity was calibrated with a silicon photodiode detector (BS-500BK, BUNKOUKEIKI CO., LTD.). Each device was measured with a scan rate of 100 mV/s<sup>-1</sup> using a Keithley 2400 source meter. The external quantum efficiency (EQE) spectra were characterized using a CompactStat instrument (Ivium Technologies; Eindhoven, Netherlands) comprised of a power source (Abet Technologies 150 W xenon lamp, 13014) and a monochromator (DongWoo Optron, MonoRa500i). The system was calibrated with the same photodiode detector for the solar simulator. Space-charge limited current (SCLC) measurement was performed using a Keithley 2400 source meter. The scan range of the voltage was 0 V - 5 V and the measurement was conducted in a dark condition.

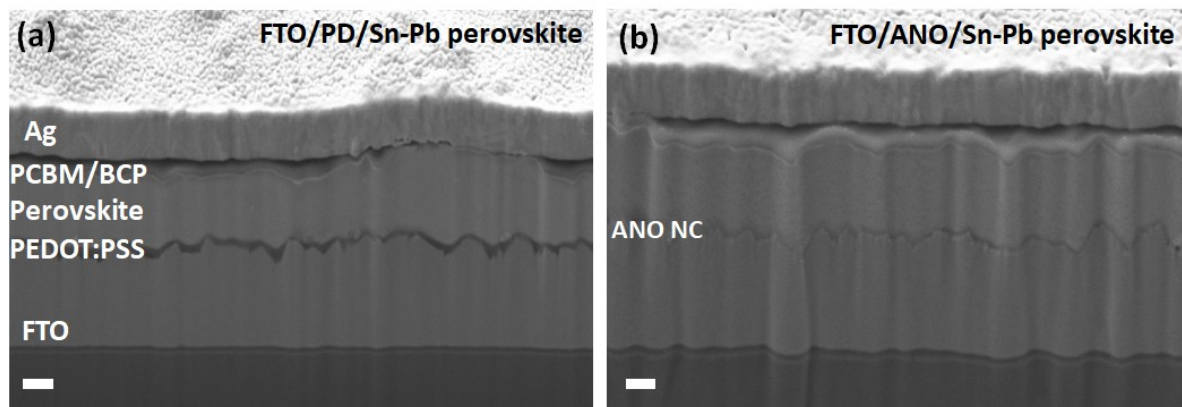

**Fig. S1** The cross-sectional images for MA-free Sn-Pb perovskite devices with PEDOT:PSS (PD) and ANO NC HTLs observed by focused ion beam(FIB)-scanning electron microscope(SEM). Scale bar: 200 nm.

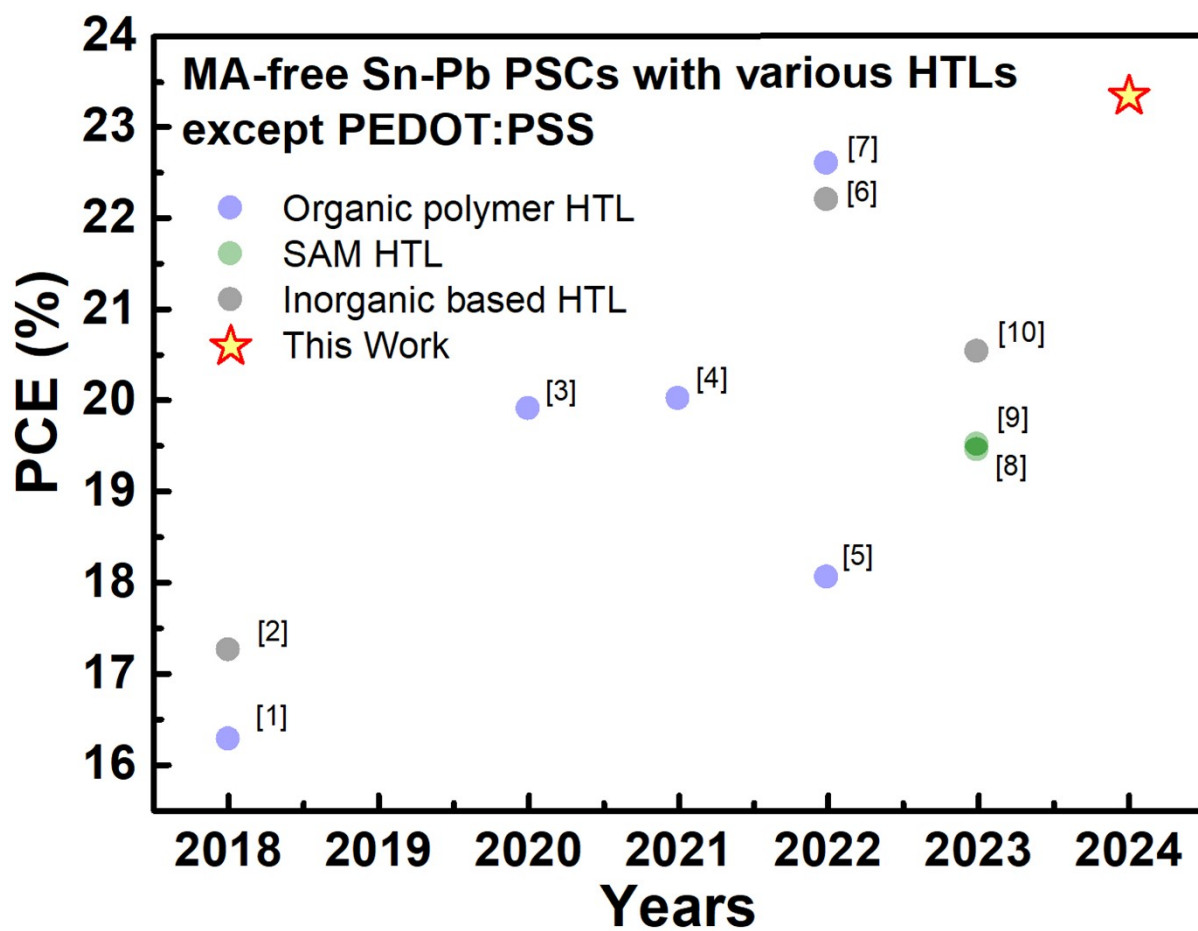

**Fig. S2** PCE distribution of the MA-free Sn-Pb PSCs fabricated with various HTLs except PEDOT:PSS reported to date, including our work.<sup>1-10</sup>



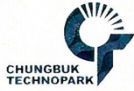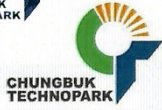

# CHUNGBUK TECHNO PARK

9, Jeongtong-ro, Deoksan-myeon, Jinceon-gun, Chungbuk, Korea  
TEL:+82-43-270-2472 FAX:+82-43-270-2489 <http://www.cbtp.or.kr>

CBTP-24SB-0002

## TEST REPORT

|                                                                                                                                                                                                                                     |                  |                                                                                      |                               |                                           |
|-------------------------------------------------------------------------------------------------------------------------------------------------------------------------------------------------------------------------------------|------------------|--------------------------------------------------------------------------------------|-------------------------------|-------------------------------------------|
| Applicant                                                                                                                                                                                                                           | Trade Name       | Chung-Ang University                                                                 |                               |                                           |
|                                                                                                                                                                                                                                     | Address          | 84, Heukseok-ro, Dongjak-gu, Seoul, Republic of Korea                                |                               |                                           |
|                                                                                                                                                                                                                                     | Telephone Number | -                                                                                    | Fax Number                    | -                                         |
| Product                                                                                                                                                                                                                             | Name             | Perovskite Based Solar Cell                                                          |                               |                                           |
|                                                                                                                                                                                                                                     | Model Name       | Sn-Pb Perovskite Solar Cell                                                          |                               |                                           |
|                                                                                                                                                                                                                                     | Manufacturer     | Chung-Ang University                                                                 |                               |                                           |
| Issued Date                                                                                                                                                                                                                         |                  | 2023.                                                                                | 11.                           | 27.                                       |
| Test Date                                                                                                                                                                                                                           |                  | 2023.                                                                                | 12.                           | 21. ~ 2023. 12. 21.                       |
| Test Method                                                                                                                                                                                                                         |                  | Refer                                                                                |                               |                                           |
| Test Results                                                                                                                                                                                                                        |                  | <input type="checkbox"/> Pass                                                        | <input type="checkbox"/> Fail | <input checked="" type="checkbox"/> Refer |
| Test Engineer                                                                                                                                                                                                                       |                  | Deputy Chief Engineer                                                                |                               |                                           |
| 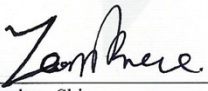                                                                                                                                                 |                  |  |                               |                                           |
| Yeonbae Shin                                                                                                                                                                                                                        |                  | Woo-Jun, Nam                                                                         |                               |                                           |
| <p>This report only responds to the tested sample and may not be reproduced, except in full, without written approval of the CHUNGBUK TECHNO PARK. The test results presented in this report relate only to the item(s) tested.</p> |                  |                                                                                      |                               |                                           |
| <p>Jan. 04, 2024</p> <h3>CHUNGBUK TECHNO PARK</h3>                                                                                                                                                                                  |                  |                                                                                      |                               |                                           |

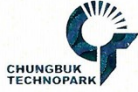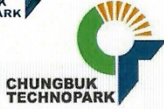

# CHUNGBUK TECHNOPARK

9, Jeongtong-ro, Deoksan-myeon, Jincheon-gun, Chungbuk, Korea  
TEL:+82-43-270-2472 FAX:+82-43-270-2489 <http://www.cbtp.or.kr>

## 1. Test Laboratory

### 1.1 General Information

|                    |                                                                   |
|--------------------|-------------------------------------------------------------------|
| Name of Laboratory | CHUNGBUK TECHNOPARK                                               |
| Representative     | Roh Keun Ho                                                       |
| Address            | 40, Yeonggudanji-ro, Ochang, Cheongwon, Cheongju, Chungbuk, Korea |
| Telephone Number   | +82-43-270-2001                                                   |
| Fax Number         | +82-43-270-2499                                                   |
| Home page          | <a href="http://www.cbtp.or.kr">www.cbtp.or.kr</a>                |

### 1.2 Location of Test Laboratory

|                  |                                                                                                                 |
|------------------|-----------------------------------------------------------------------------------------------------------------|
| Address          | Solar Technical Center 9, Jeongtong-ro, Deoksan-myeon, Jincheon-gun, Chungbuk-province 27872, Republic of Korea |
| Telephone Number | +82-43-270-2471                                                                                                 |
| Fax Number       | +82-43-270-2499                                                                                                 |

### 1.3 Accreditation Laboratory

| Accreditation Items                                                                                                                          | Accordance with the provisions                                          | Certification No.   | Mark                                                                                  |
|----------------------------------------------------------------------------------------------------------------------------------------------|-------------------------------------------------------------------------|---------------------|---------------------------------------------------------------------------------------|
| Korea Communications Commission of Republic of Korea<br>-Radio Equipment<br>-Electromagnetic Interference<br>-Electromagnetic Susceptibility | Framework Act on Telecommunications and Radio Waves Acts                | KR-0115             |  |
| FCC Part 15 & 18<br>- EMI(Radiated & Conducted Emission)                                                                                     | ANSI 63.4                                                               | Registration No.924 |  |
| VCCI<br>EMI(Radiated & Conducted Emission)                                                                                                   | VCCI                                                                    | 2765                |  |
| Conformitee European EMC                                                                                                                     | 2006/28/EC, ECE R10.03                                                  | ROK0820C            |  |
| Electrical Characteristics of Photovoltaic                                                                                                   | KS C IEC 61215 : 2006<br>KS C 8561 : 2020<br>KS C IEC 60068-2-52 : 2010 | KT391               |  |

## 2. Test Standard

### 2.1 Application Certification

| Standards                                                                                      | Contents                                                                                                                                                                                       |
|------------------------------------------------------------------------------------------------|------------------------------------------------------------------------------------------------------------------------------------------------------------------------------------------------|
| Determine the current-voltage characteristic of the module in accordance with KS C IEC 60904-1 | I. Test condition<br>a. Temperature Condition : 25 °C<br>b. Irradiance : 100 mW/cm <sup>2</sup><br>II. Apparatus<br>a. Solar Simulator Class BBB or better in accordance with KS C IEC 60904-9 |

## 3. Information of DUT(Device Under Test)

### 3.1 Information of DUT

| No. | Model                       | Structure                                                           | Area                 |
|-----|-----------------------------|---------------------------------------------------------------------|----------------------|
| # 1 | Sn-Pb Perovskite Solar Cell | Glass/FTO/Al-NiO <sub>x</sub> /MA-free Sn-Pb perovskite/PCBM/BCP/Ag | 0.04 cm <sup>2</sup> |

### 3.2 Device Picture

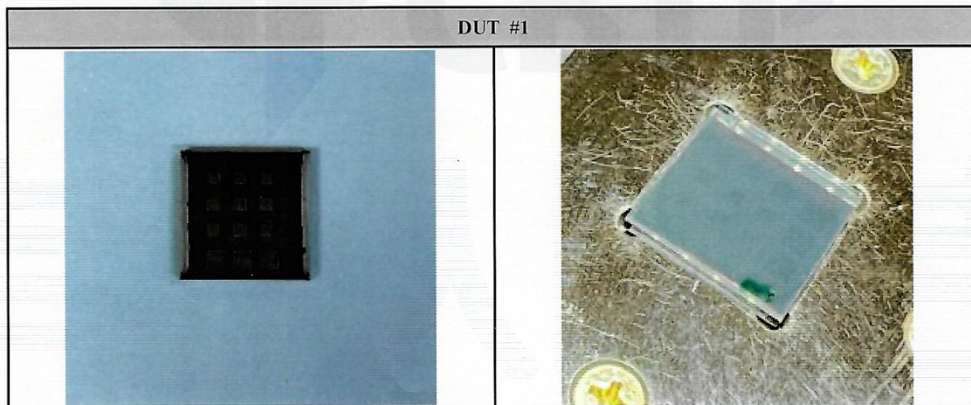

## 4. Test Item and Results

### 4.1 Test Item

- 1) Test Purposes : Measurement of electrical and optical properties of perovskite solar cells
- 2) Laboratory environmental conditions
  - Temperature : (25 ± 1) °C
  - Humidity : (30 ± 5) % R.H.
- 3) DUT No. : # 1
- 4) Test Equipment

| No. | Description    | Model                      | Manufacturer |
|-----|----------------|----------------------------|--------------|
| 1   | Cell Simulator | DKIVT-30 PV Cell IV Tester | DENKEN       |
| 2   | Source meter   | 2401                       | Keithely     |

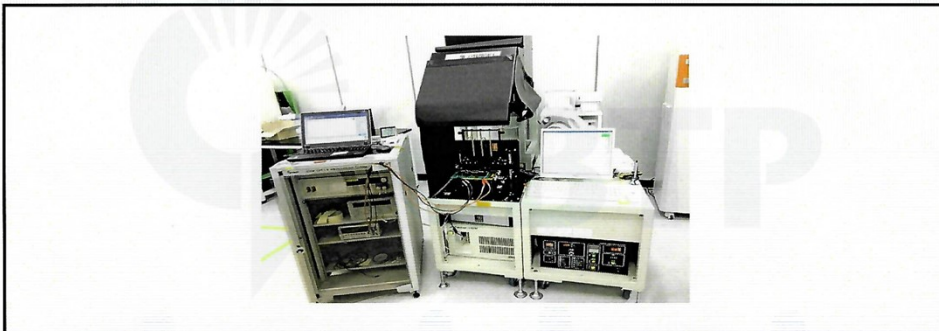

### 5) Test Methods

#### 5.1 Measurement of Photovoltaic Current - Voltage Characteristics

- ① Set up the intensity of light and temperature of under the required conditions
- ② Calibrated using a certified cell under test conditions (AM 1.5 Global, 100 mW/cm<sup>2</sup>)
- ③ Measure and record the characteristic value (output) by connecting the electrode of the sample

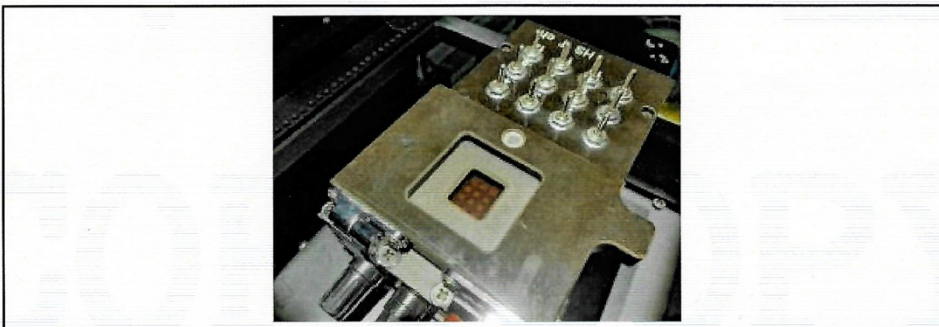

#### 4.2 Test Results

##### 1) Measurement of Photovoltaic Current - Voltage Characteristics

###### ① I-V Characteristics

| DUT | Voc<br>( V ) | Isc<br>( mA ) | Vmp<br>( V ) | Imp<br>( mA ) | FF<br>( % ) | Power<br>( mW ) | Efficiency<br>( % ) | Area<br>( cm <sup>2</sup> ) |
|-----|--------------|---------------|--------------|---------------|-------------|-----------------|---------------------|-----------------------------|
| # 1 | 0.896        | 1.36          | 0.738        | 1.24          | 75.10       | 0.916           | 22.90               | 0.04                        |

###### ② I-V Curve

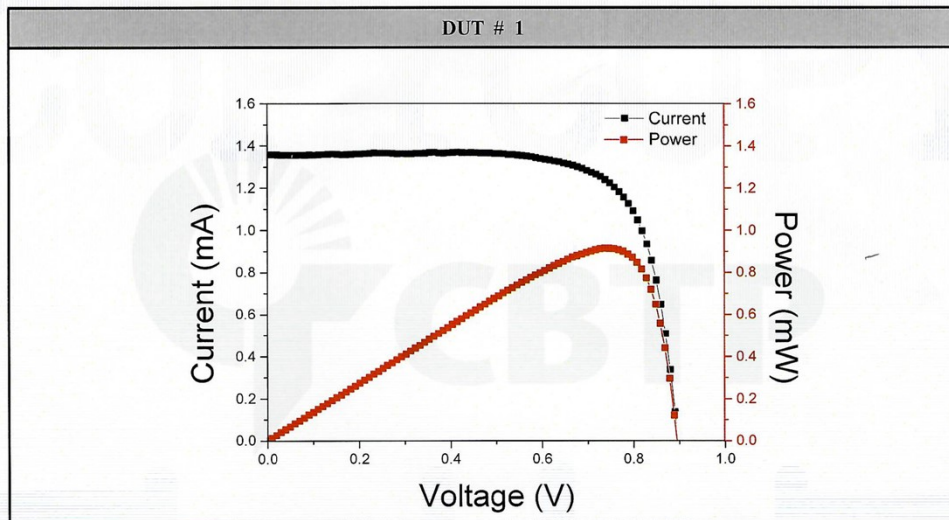

- Last page -

# TEST REPORT

**KIMS** Korea Institute of  
Materials Science  
797 Changwondaero, Sungsan-gu, Changwon-si,  
Gyeongsangnam-do, 51508, Korea  
Tel : 055-280-3784, Fax : 055-280-3788

Report No. :  
2441-0265-01359

Page 1 / 2 Pages

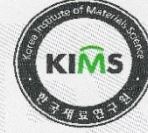

## 1. Client

- Name : Chung-Ang University Industry Academic Cooperation Foundation
- Address : (06974) 84, Heukseok-ro, Dongjak-gu, Seoul, Rep. of Korea

## 2. Sample Description

- Product Name : Sn-Pb binary metal halide perovskite solar cell
- Product No. : Sn-Pb\_AEDL\_CAU-01
- Material : Perovskite ( $\text{BA}_{0.02}(\text{FA}_{0.83}\text{Cs}_{0.17})_{0.98}\text{Sn}_{0.5}\text{Pb}_{0.5}\text{I}_3$ )
- No. of Item : 1 EA.

3. Date of Test : 2024. 09. 06

4. Location of Test :  Permanent Testing Lab  On Site Testing  
(Address: 797 Changwondaero, Sungsan-gu, Changwon-si, Gyeongsangnam-do, Republic of Korea)

5. Test method used : KS C IEC 60904-8 Standard Test Method for Spectral Responsivity Measurements of Photovoltaic Devices

The QuantX-300 Quantum Efficiency Measurement System  
Reference Cell: Device S/N(BD024), Device Materials(mono-Si)

6. Test Result : Refer to Test Results

|             |                                                                                                          |                                                                                                             |
|-------------|----------------------------------------------------------------------------------------------------------|-------------------------------------------------------------------------------------------------------------|
| Affirmation | Tested by                                                                                                | Approved by                                                                                                 |
|             | Name : Jung-Dae Kwon  | Name : Sung-Mook Choi  |

The above test report is based on the test results of the test sample(s) submitted by the client.

Sept. 06, 2024.

**Chul Jin Choi**  
Korea Institute of Materials Science

Note: 1. The results shown in this test report refer only to the sample(s) tested and KIMS do not guarantee the quality of all products of the customer.  
2. This test report cannot be reproduced except in full, without the written approval of KIMS.

# TEST RESULTS

**KIMS** Korea Institute of  
Materials Science  
797 Changwondaero, Sungsan-gu, Changwon-si,  
Gyeongsangnam-do, 51508, Korea  
Tel : 055-280-3784, Fax : 055-280-3788

Report No. :  
2441-0265-01359  
Page 2 / 2 Pages

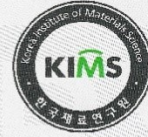

Sample: Sn-Pb\_AEDL\_CAU-01  
Sept 06, 2024 13:56

Temperature =  $25.0 \pm 2^\circ\text{C}$   
Device Area =  $0.04 \text{ cm}^2$

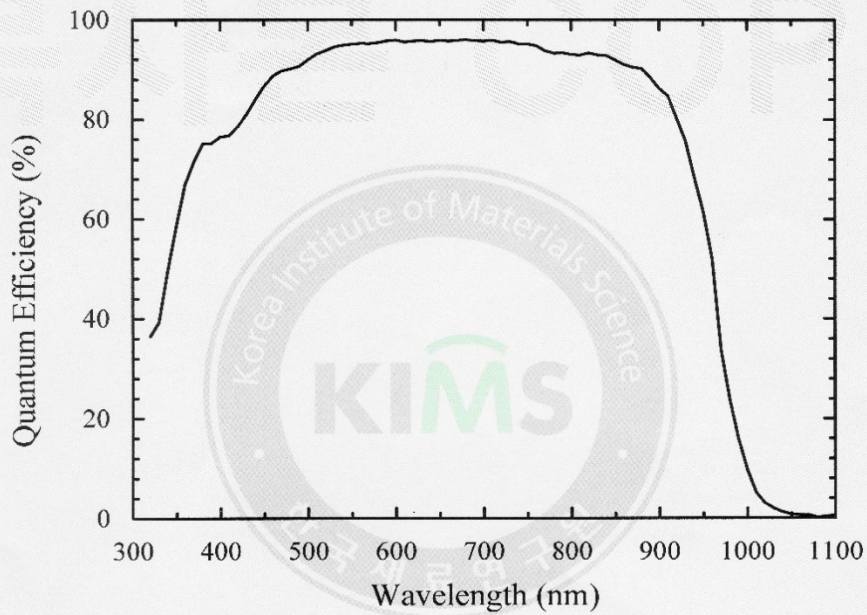

-Zero voltage bias

End.

**Fig. S3** The certified PCE and EQE spectrum details for the champion device.

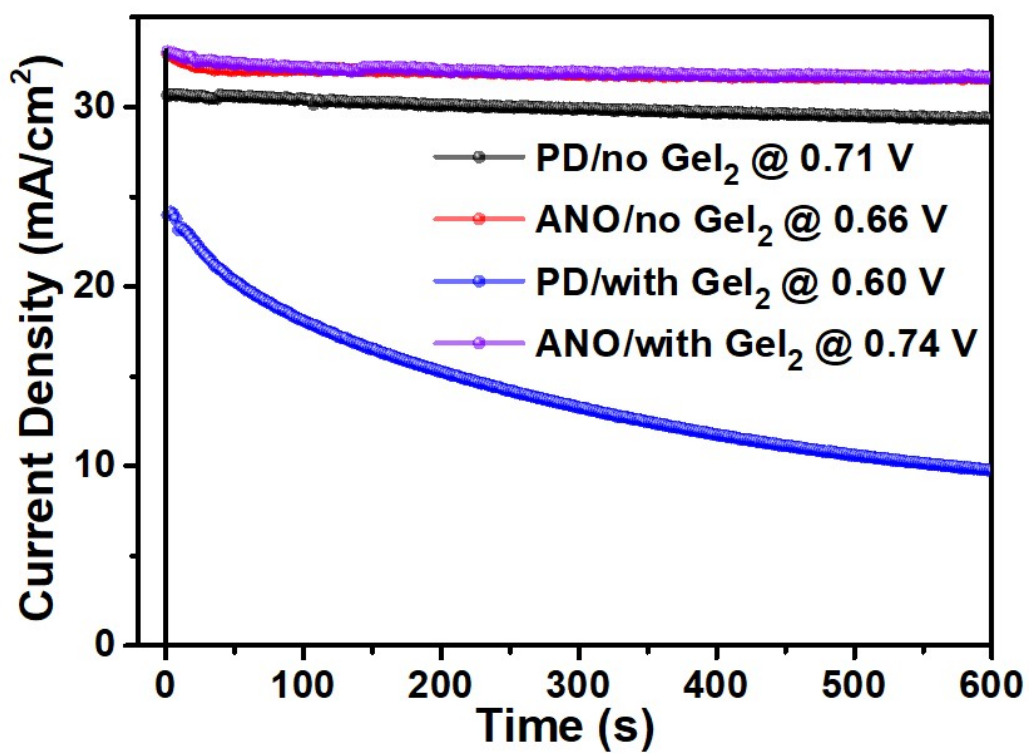

**Fig. S4** Steady-state photocurrents for the perovskite solar cells with the suggested conditions for 600 s at the maximum power point.



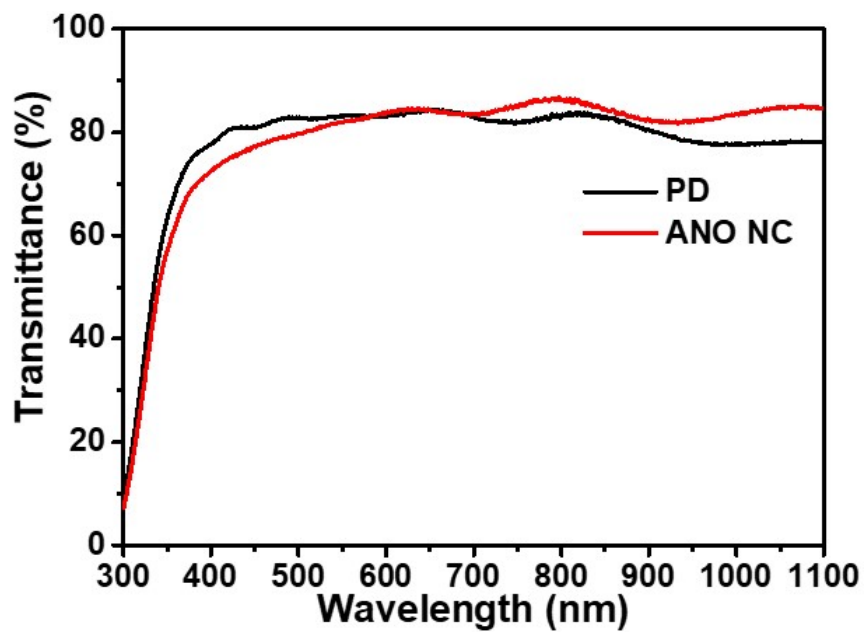

Fig. S5 Transmittance of PEDOT:PSS and ANO NC films.

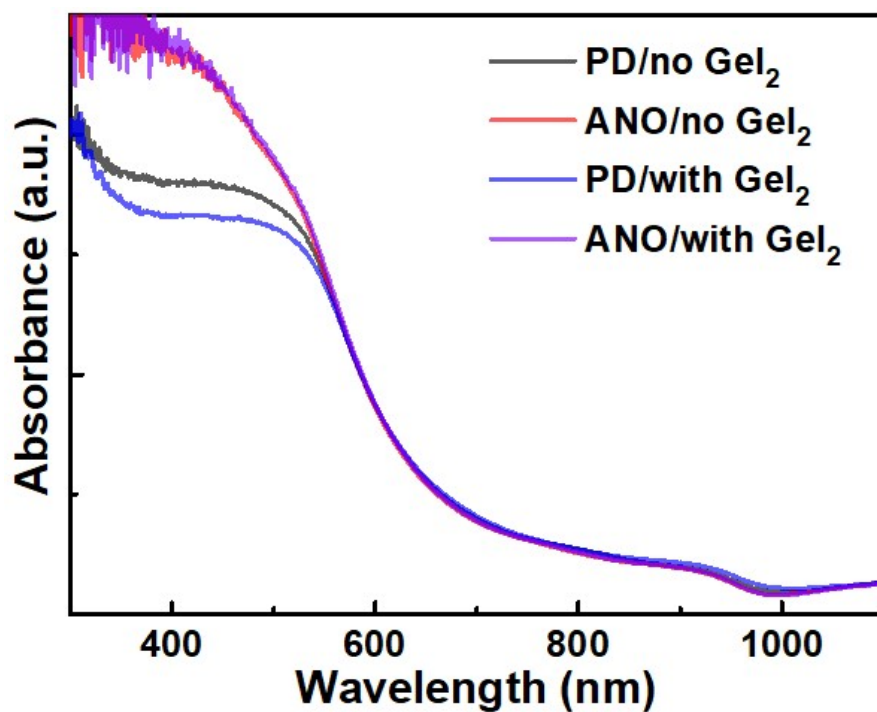

Fig. S6 Absorption spectra of the Sn-Pb perovskite films without or with  $\text{GeI}_2$  on PEDOT:PSS or ANO HTLs.

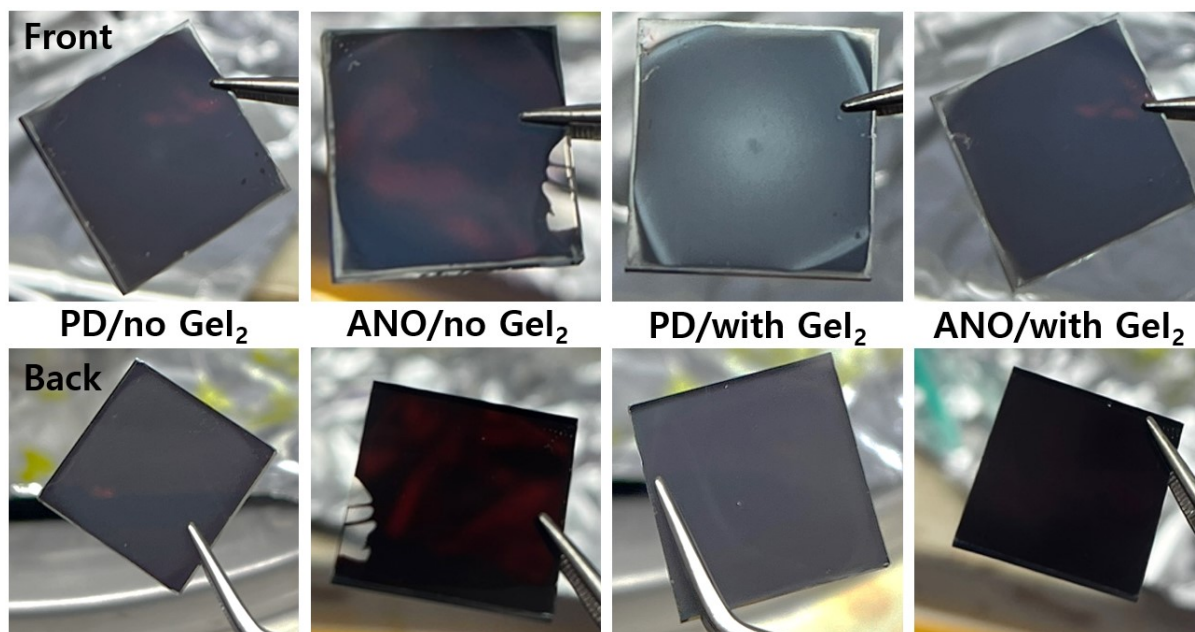

**Fig. S7** Photographs of FTO/HTL/perovskite films with PD/no GeI<sub>2</sub>, ANO/no GeI<sub>2</sub>, PD/with GeI<sub>2</sub>, ANO/with GeI<sub>2</sub> conditions.

**Table S1.** Photovoltaic performance parameters of the PD/no GeI<sub>2</sub> Sn-Pb PSCs under AM 1.5 illumination (100 mW/cm<sup>2</sup>) measured in the air (RT, RH: 30-40%)

| PD/no GeI <sub>2</sub><br># | V <sub>oc</sub> (V) | J <sub>sc</sub> (mA/cm <sup>2</sup> ) | FF (%)     | PCE (%)    |
|-----------------------------|---------------------|---------------------------------------|------------|------------|
| 1                           | 0.83                | 31.08                                 | 67.61      | 17.47      |
| 2                           | 0.85                | 31.29                                 | 71.82      | 19.04      |
| 3                           | 0.86                | 31.33                                 | 73.17      | 19.61      |
| 4                           | 0.86                | 31.35                                 | 73.72      | 19.84      |
| 5                           | 0.86                | 31.33                                 | 74.09      | 19.95      |
| 6                           | 0.86                | 31.26                                 | 74.34      | 20.04      |
| 7                           | 0.86                | 31.25                                 | 74.70      | 20.15      |
| 8                           | 0.85                | 30.78                                 | 72.36      | 18.85      |
| 9                           | 0.86                | 31.19                                 | 74.20      | 19.99      |
| 10                          | 0.86                | 31.63                                 | 72.12      | 19.57      |
| 11                          | 0.85                | 31.39                                 | 74.54      | 19.86      |
| 12                          | 0.85                | 31.40                                 | 74.57      | 19.93      |
| 13                          | 0.85                | 31.41                                 | 74.22      | 19.88      |
| 14                          | 0.82                | 31.36                                 | 70.20      | 18.05      |
| 15                          | 0.82                | 30.68                                 | 70.36      | 17.76      |
| 16                          | 0.83                | 30.68                                 | 71.15      | 18.05      |
| 17                          | 0.83                | 30.68                                 | 70.98      | 18.01      |
| 18                          | 0.82                | 30.64                                 | 71.20      | 17.91      |
| 19                          | 0.83                | 31.30                                 | 74.23      | 19.39      |
| 20                          | 0.84                | 31.19                                 | 75.78      | 19.89      |
| 21                          | 0.84                | 31.20                                 | 74.63      | 19.51      |
| 22                          | 0.84                | 31.15                                 | 74.28      | 19.35      |
| 23                          | 0.83                | 31.13                                 | 73.18      | 18.81      |
| 24                          | 0.83                | 30.01                                 | 72.59      | 18.12      |
| 25                          | 0.84                | 30.02                                 | 73.25      | 18.49      |
| 26                          | 0.84                | 29.93                                 | 73.40      | 18.45      |
| 27                          | 0.84                | 29.96                                 | 73.52      | 18.59      |
| 28                          | 0.84                | 29.85                                 | 73.55      | 18.51      |
| 29                          | 0.85                | 29.99                                 | 73.78      | 18.73      |
| 30                          | 0.85                | 29.89                                 | 73.95      | 18.71      |
| Average                     | 0.84±0.013          | 30.88±0.57                            | 73.05±1.73 | 19.02±0.81 |

**Table S2.** Photovoltaic performance parameters of the ANO/no GeI<sub>2</sub> Sn-Pb PSCs under AM 1.5 illustration (100 mW/cm<sup>2</sup>) measured in the air (RT, RH: 30-40%)

| ANO/no GeI <sub>2</sub><br># | V <sub>oc</sub> (V) | J <sub>sc</sub> (mA/cm <sup>2</sup> ) | FF (%)     | PCE (%)    |
|------------------------------|---------------------|---------------------------------------|------------|------------|
| 1                            | 0.85                | 32.50                                 | 70.39      | 19.38      |
| 2                            | 0.85                | 32.68                                 | 63.06      | 17.56      |
| 3                            | 0.84                | 32.45                                 | 67.14      | 18.36      |
| 4                            | 0.83                | 33.40                                 | 69.85      | 19.38      |
| 5                            | 0.84                | 31.90                                 | 72.18      | 19.39      |
| 6                            | 0.85                | 31.73                                 | 72.78      | 19.52      |
| 7                            | 0.82                | 32.43                                 | 69.15      | 18.41      |
| 8                            | 0.83                | 31.83                                 | 71.25      | 18.86      |
| 9                            | 0.83                | 32.00                                 | 72.29      | 19.23      |
| 10                           | 0.81                | 33.28                                 | 72.31      | 19.38      |
| 11                           | 0.82                | 32.68                                 | 70.79      | 18.96      |
| 12                           | 0.82                | 32.53                                 | 70.96      | 18.89      |
| 13                           | 0.82                | 32.29                                 | 71.15      | 18.81      |
| 14                           | 0.82                | 32.14                                 | 70.89      | 18.63      |
| 15                           | 0.82                | 33.04                                 | 70.42      | 19.09      |
| 16                           | 0.82                | 32.86                                 | 70.56      | 19.01      |
| 17                           | 0.80                | 32.64                                 | 67.79      | 17.67      |
| 18                           | 0.82                | 32.32                                 | 68.34      | 18.10      |
| 19                           | 0.82                | 32.40                                 | 69.06      | 18.45      |
| 20                           | 0.84                | 33.86                                 | 62.61      | 17.77      |
| 21                           | 0.85                | 32.62                                 | 69.80      | 19.43      |
| 22                           | 0.85                | 31.58                                 | 67.16      | 18.03      |
| 23                           | 0.85                | 32.68                                 | 66.81      | 18.56      |
| 24                           | 0.85                | 32.77                                 | 68.50      | 19.12      |
| 25                           | 0.84                | 32.28                                 | 72.10      | 19.50      |
| 26                           | 0.83                | 32.09                                 | 71.81      | 19.18      |
| 27                           | 0.83                | 33.09                                 | 68.24      | 18.64      |
| 28                           | 0.84                | 32.31                                 | 69.67      | 18.81      |
| 29                           | 0.83                | 33.10                                 | 69.19      | 18.95      |
| 30                           | 0.84                | 32.65                                 | 68.61      | 18.77      |
| Average                      | 0.83±0.014          | 32.54±0.51                            | 69.50±2.46 | 18.79±0.55 |

**Table S3.** Photovoltaic performance parameters of the PD/with GeI<sub>2</sub> PSCs under AM 1.5 illumination (100 mW/cm<sup>2</sup>) measured in the air (RT, RH: 30-40%)

| PD/with GeI <sub>2</sub><br># | V <sub>oc</sub> (V) | J <sub>sc</sub> (mA/cm <sup>2</sup> ) | FF (%)     | PCE (%)    |
|-------------------------------|---------------------|---------------------------------------|------------|------------|
| 1                             | 0.75                | 29.86                                 | 65.61      | 14.63      |
| 2                             | 0.74                | 30.39                                 | 61.33      | 13.82      |
| 3                             | 0.76                | 30.47                                 | 66.77      | 15.41      |
| 4                             | 0.76                | 30.36                                 | 66.33      | 15.21      |
| 5                             | 0.77                | 29.53                                 | 60.38      | 13.75      |
| 6                             | 0.75                | 31.49                                 | 61.56      | 14.55      |
| 7                             | 0.76                | 31.19                                 | 63.37      | 14.97      |
| 8                             | 0.78                | 30.75                                 | 65.53      | 15.69      |
| 9                             | 0.78                | 30.28                                 | 65.89      | 15.63      |
| 10                            | 0.79                | 26.16                                 | 60.48      | 12.48      |
| 11                            | 0.79                | 25.79                                 | 60.43      | 12.24      |
| 12                            | 0.76                | 26.89                                 | 58.57      | 11.92      |
| 13                            | 0.74                | 30.78                                 | 58.03      | 13.21      |
| 14                            | 0.74                | 31.00                                 | 64.67      | 14.81      |
| 15                            | 0.73                | 30.82                                 | 64.52      | 14.60      |
| 16                            | 0.72                | 28.96                                 | 56.92      | 11.92      |
| 17                            | 0.74                | 30.30                                 | 63.29      | 14.19      |
| 18                            | 0.73                | 30.13                                 | 60.29      | 13.28      |
| 19                            | 0.74                | 30.14                                 | 61.98      | 13.85      |
| 20                            | 0.77                | 30.88                                 | 62.60      | 14.82      |
| 21                            | 0.76                | 30.65                                 | 61.83      | 14.35      |
| 23                            | 0.74                | 30.39                                 | 61.33      | 13.82      |
| 24                            | 0.73                | 30.94                                 | 60.23      | 13.61      |
| 25                            | 0.73                | 30.96                                 | 59.19      | 13.43      |
| 26                            | 0.76                | 30.29                                 | 59.09      | 13.57      |
| 27                            | 0.76                | 31.27                                 | 63.36      | 15.02      |
| 28                            | 0.76                | 30.93                                 | 61.72      | 14.43      |
| 29                            | 0.72                | 31.25                                 | 60.72      | 13.68      |
| 30                            | 0.78                | 29.95                                 | 61.35      | 14.34      |
| Average                       | 0.75±0.019          | 30.11±1.41                            | 61.96±2.55 | 14.04±1.02 |

**Table S4.** Photovoltaic performance parameters of the ANO/with GeI<sub>2</sub> PSCs under AM 1.5 illumination (100 mW/cm<sup>2</sup>) measured in the air (RT, RH: 30-40%)

| ANO/with GeI <sub>2</sub><br># | V <sub>oc</sub> (V) | J <sub>sc</sub> (mA/cm <sup>2</sup> ) | FF (%)     | PCE (%)    |
|--------------------------------|---------------------|---------------------------------------|------------|------------|
| 1                              | 0.88                | 33.65                                 | 77.91      | 23.08      |
| 2                              | 0.88                | 33.54                                 | 77.69      | 22.93      |
| 3                              | 0.87                | 33.66                                 | 77.37      | 22.71      |
| 4                              | 0.87                | 33.16                                 | 79.51      | 22.83      |
| 5                              | 0.87                | 33.29                                 | 79.64      | 22.99      |
| 6                              | 0.87                | 33.20                                 | 79.58      | 22.88      |
| 7                              | 0.88                | 32.64                                 | 78.97      | 22.59      |
| 8                              | 0.86                | 33.59                                 | 79.89      | 23.16      |
| 9                              | 0.85                | 33.71                                 | 79.23      | 22.78      |
| 10                             | 0.86                | 33.57                                 | 79.01      | 22.91      |
| 11                             | 0.87                | 33.56                                 | 79.23      | 23.00      |
| 12                             | 0.87                | 33.56                                 | 79.34      | 23.04      |
| 13                             | 0.87                | 33.58                                 | 79.57      | 23.17      |
| 14                             | 0.87                | 32.91                                 | 80.89      | 23.06      |
| 15                             | 0.86                | 32.91                                 | 80.25      | 22.84      |
| 16                             | 0.86                | 32.90                                 | 79.87      | 22.67      |
| 17                             | 0.87                | 33.62                                 | 78.53      | 23.02      |
| 18                             | 0.87                | 32.97                                 | 78.87      | 22.68      |
| 19                             | 0.87                | 33.46                                 | 77.82      | 22.58      |
| 20                             | 0.87                | 33.88                                 | 79.46      | 23.34      |
| 21                             | 0.87                | 33.42                                 | 78.41      | 22.74      |
| 22                             | 0.87                | 33.63                                 | 79.40      | 23.30      |
| 23                             | 0.87                | 33.57                                 | 78.71      | 23.05      |
| 24                             | 0.86                | 33.75                                 | 79.62      | 23.00      |
| 25                             | 0.85                | 33.68                                 | 79.48      | 22.87      |
| 26                             | 0.86                | 33.21                                 | 79.24      | 22.63      |
| 27                             | 0.87                | 32.93                                 | 78.65      | 22.51      |
| 28                             | 0.87                | 33.46                                 | 77.82      | 22.58      |
| 29                             | 0.85                | 33.71                                 | 79.23      | 22.78      |
| 30                             | 0.85                | 33.75                                 | 79.18      | 22.81      |
| Average                        | 0.87±0.007          | 33.41±0.32                            | 79.08±0.79 | 22.88±0.22 |

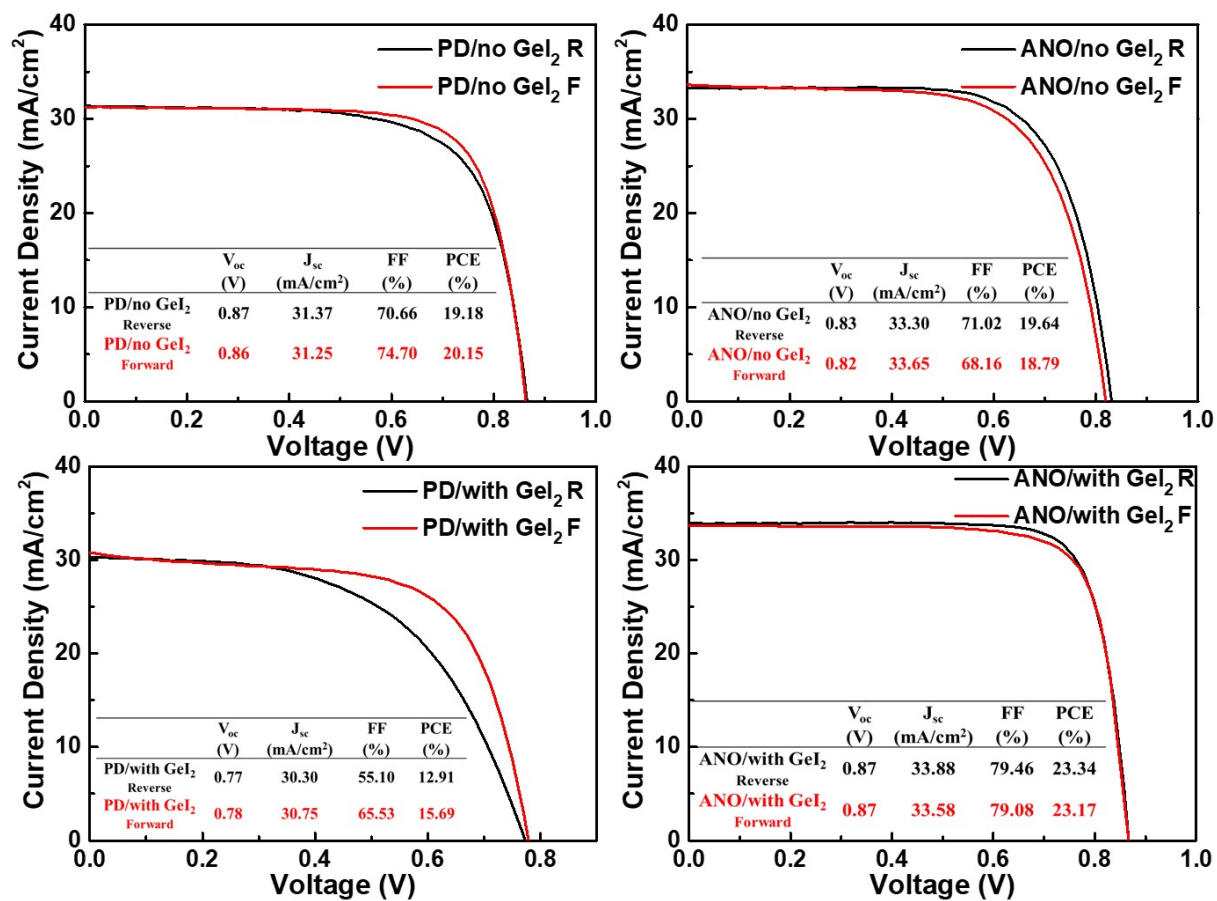

**Fig. S8** J-V curves (forward and reverse scans) of the PSCs with the suggested conditions (PD/no GeI<sub>2</sub>, ANO/no GeI<sub>2</sub>, PD/with GeI<sub>2</sub>, and ANO/with GeI<sub>2</sub>)

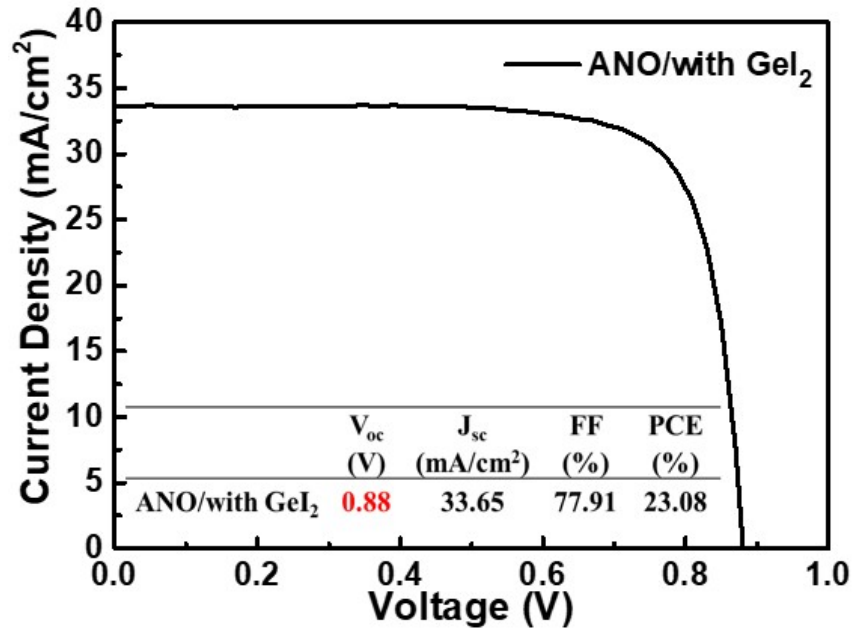

Fig. S9 J-V curve of ANO/with GeI<sub>2</sub> PSC with the highest  $V_{oc}$

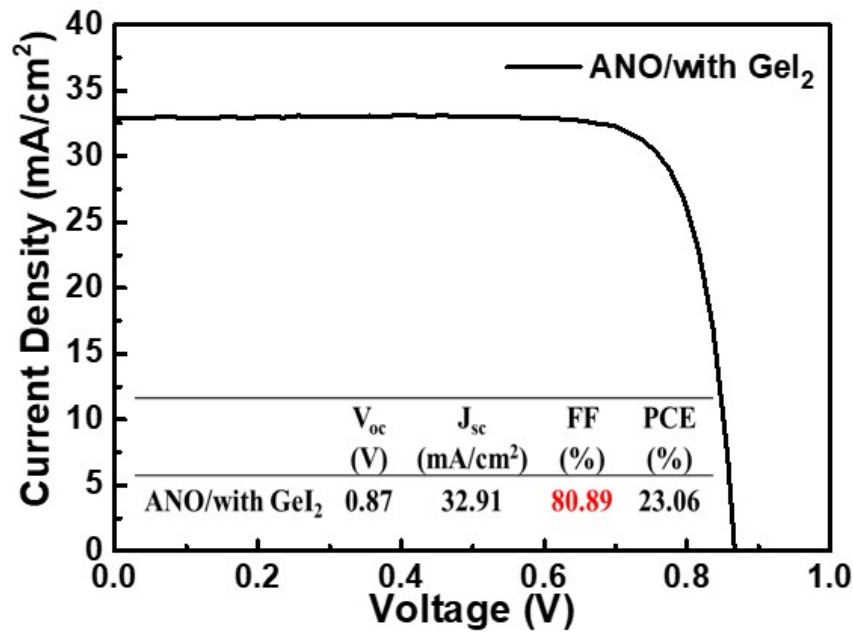

Fig. S10 J-V curve of ANO/with GeI<sub>2</sub> PSC with the highest fill factor



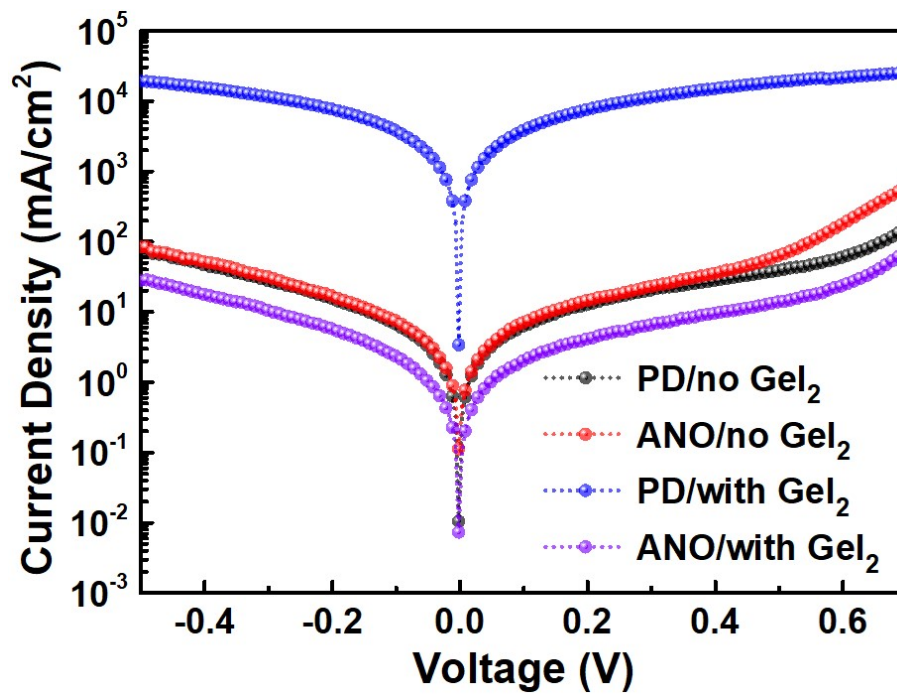

Fig. S11 The dark J-V characterization of the perovskite devices.

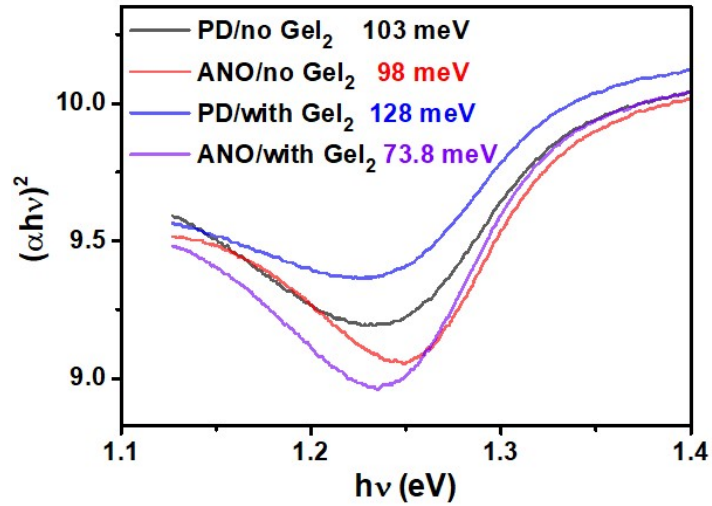

**Fig. S12** Plots of  $\ln(\alpha)$  versus  $h\nu$  to extract the Urbach energy ( $E_u$ ) of the Sn-Pb perovskite films.  $E_u$  can be determined using the relation  $\alpha = \alpha_0 \exp(E/E_u)$ , where  $\alpha$  is the absorption coefficient and  $E (= h\nu)$  is the photon energy.

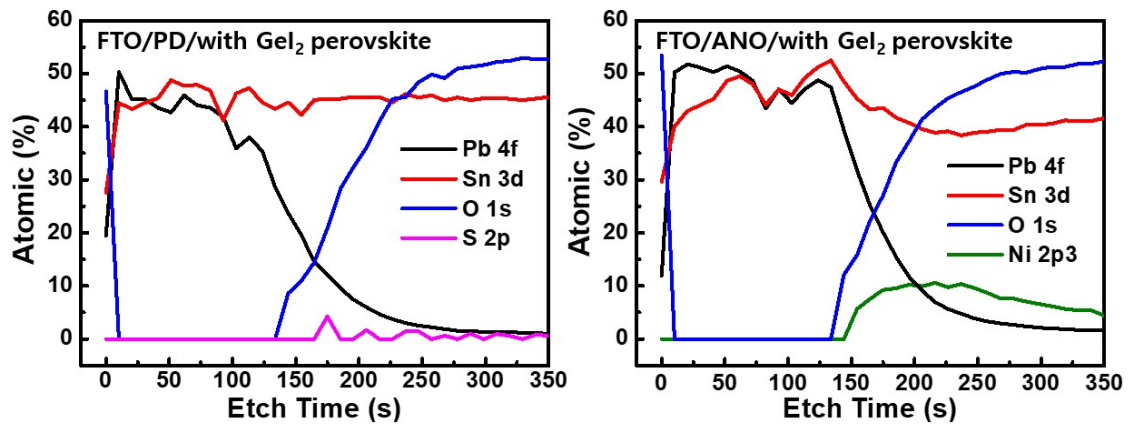

**Fig. S13** The distribution of elements for FTO/PEDOT:PSS (PD) or ANO/with  $\text{GeI}_2$  perovskite films.

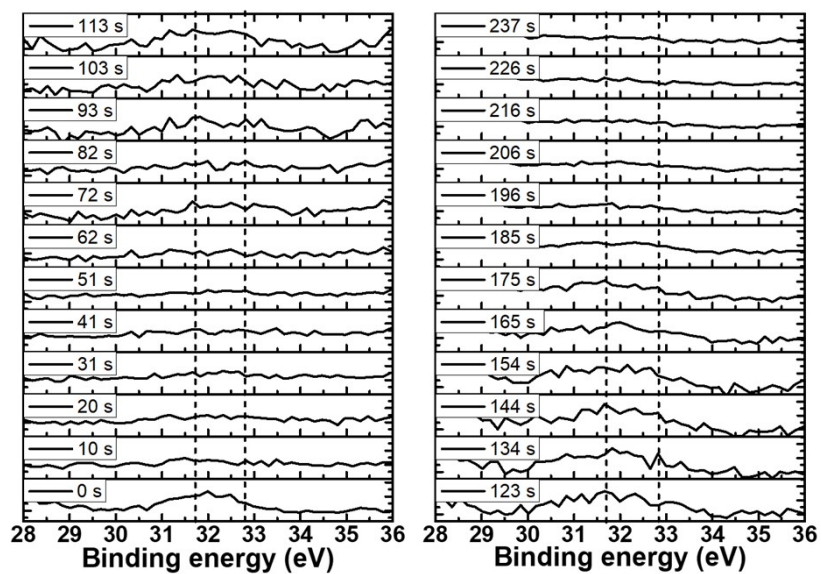

**Fig. S14** Full XPS spectra of raw data for Ge 3d (GeO: 31.7 eV and GeO<sub>2</sub>: 32.8 eV) of PD/with GeI<sub>2</sub> Sn-Pb perovskite film.

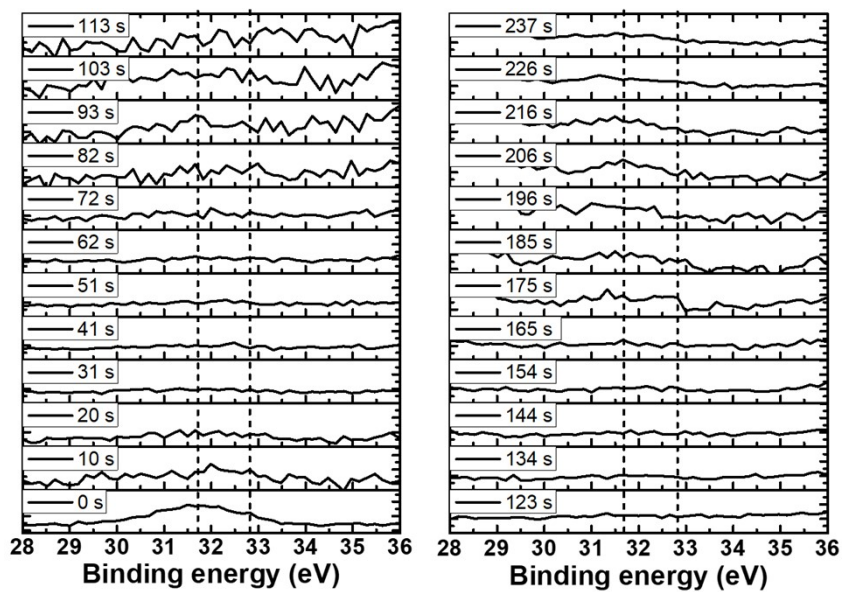

**Fig. S15** Full XPS spectra of raw data for Ge 3d (GeO: 31.7 eV and GeO<sub>2</sub>: 32.8 eV) of ANO/with GeI<sub>2</sub> Sn-Pb perovskite film.

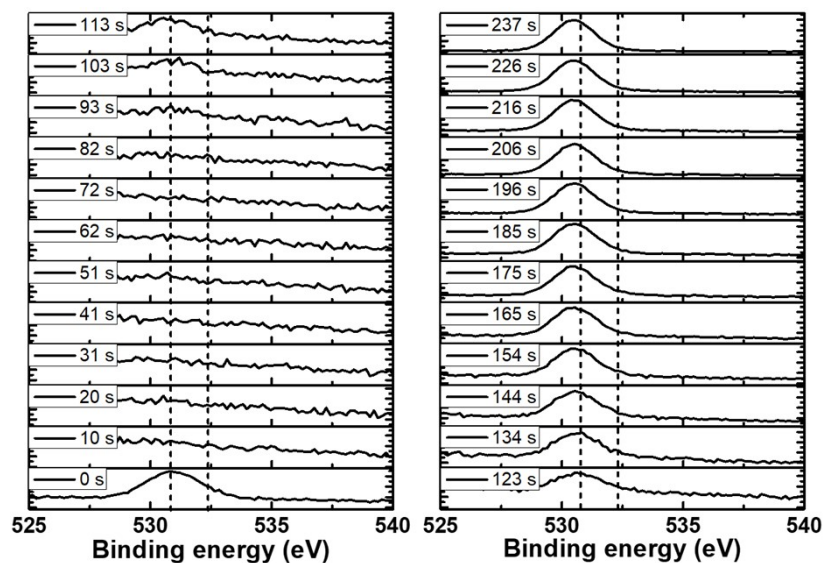

**Fig. S16** Full XPS spectra of raw data for of O 1s (GeO: 530.8 eV and GeO<sub>2</sub>: 532.4 eV) of PD/with GeI<sub>2</sub> Sn-Pb perovskite film.

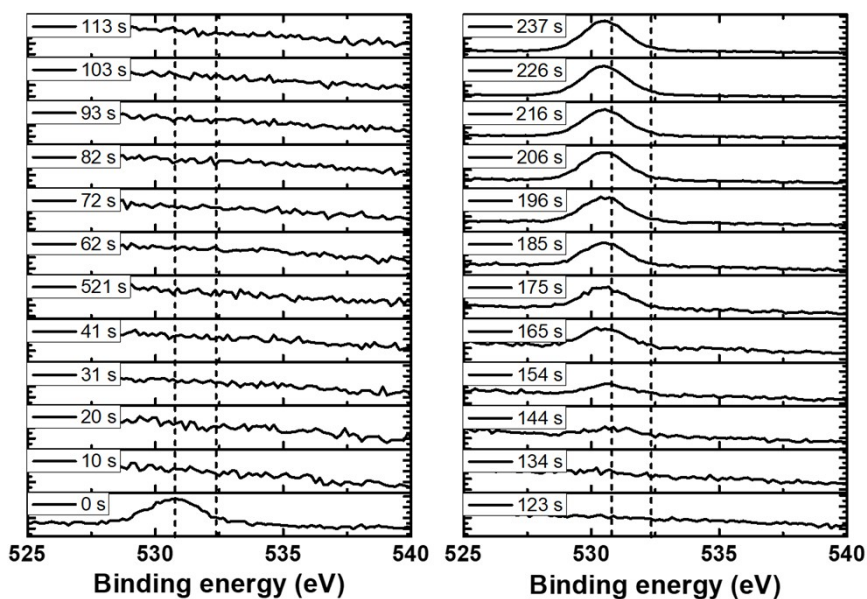

**Fig. S17** Full XPS spectra of raw data for of O 1s (GeO: 530.8 eV and GeO<sub>2</sub>: 532.4 eV) of ANO/with GeI<sub>2</sub> Sn-Pb perovskite film.

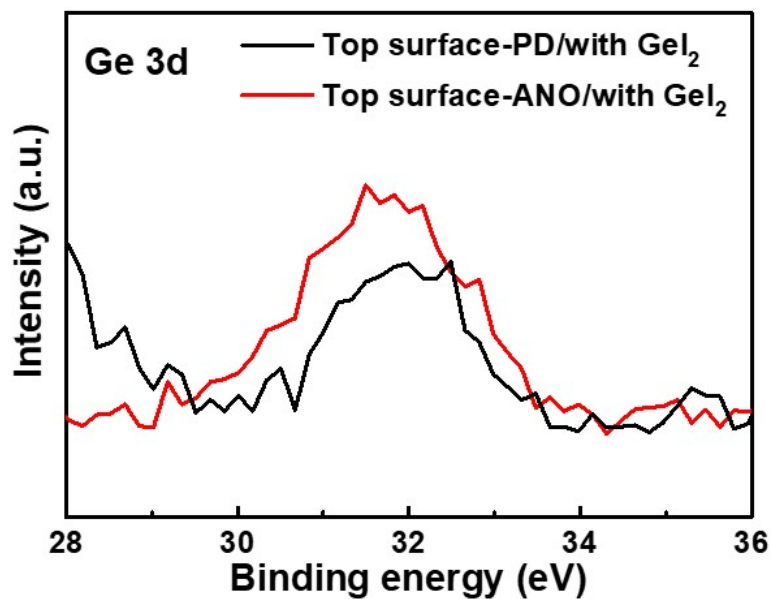

**Fig. S18** Magnified Ge 3d XPS spectra for top surface of PD/with GeI<sub>2</sub> and ANO/with GeI<sub>2</sub> Sn-Pb perovskite films.

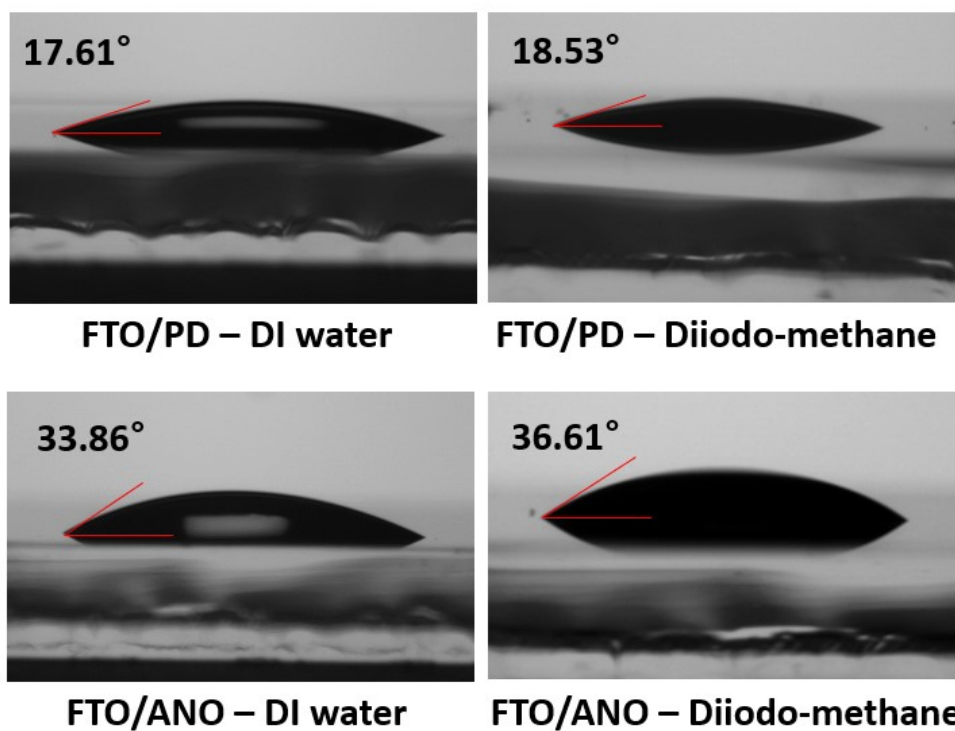

**Fig. S19** Contact angles for PEDOT:PSS (PD) and ANO HTLs with DI water and diiodo-methane solvents.

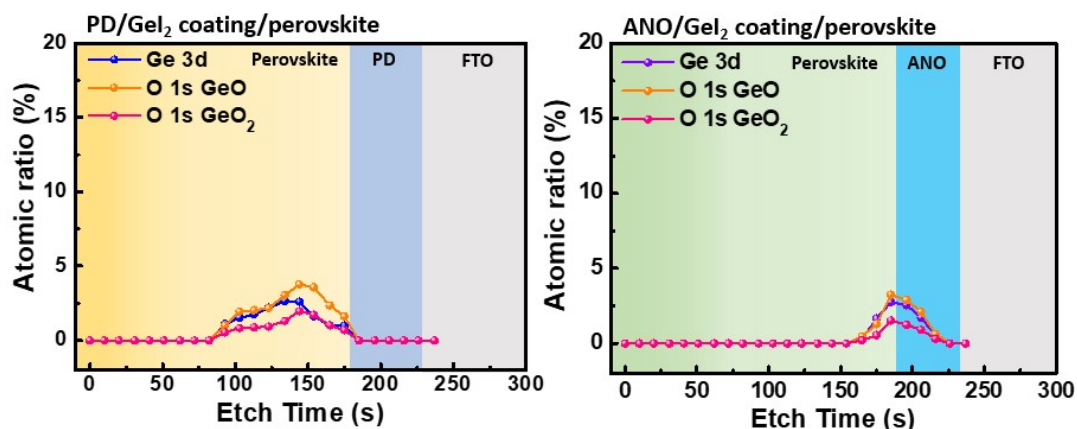

**Fig. S20** Ge 3d and O 1s distribution for  $\text{GeO}_x$  of PEDOT:PSS (PD)/ $\text{GeI}_2$  coating/perovskite and ANO/ $\text{GeI}_2$  coating/perovskite films.

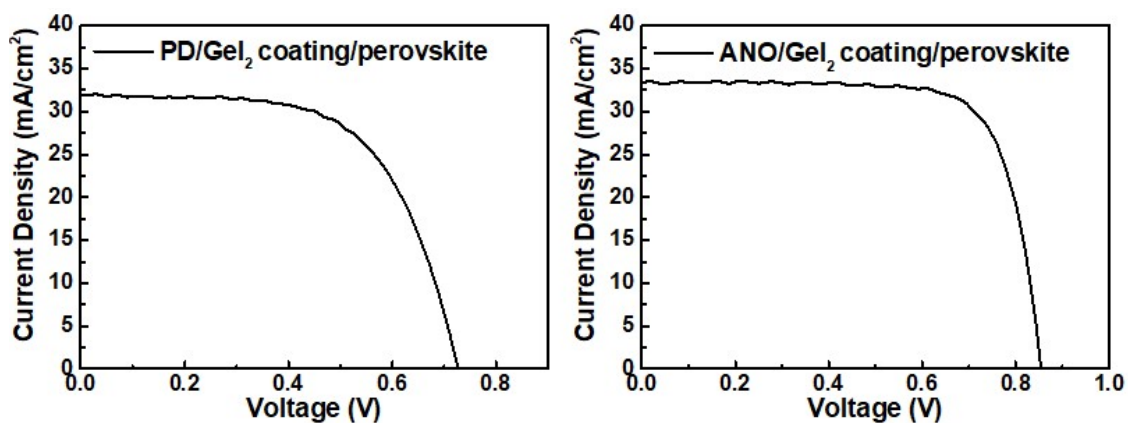

**Fig. S21** Performance of the devices for PEDOT:PSS (PD)/ $\text{GeI}_2$  coating/perovskite and ANO/ $\text{GeI}_2$  ( $\text{GeO}_x$ ) coating/perovskite conditions.

**Table S5.** Photovoltaic parameters of the devices for PD/ $\text{GeI}_2$  coating/perovskite and ANO/ $\text{GeI}_2$  coating/perovskite conditions

|                                        | $V_{oc}$ (V) | $J_{sc}$ (mA/cm <sup>2</sup> ) | FF (%) | PCE (%) |
|----------------------------------------|--------------|--------------------------------|--------|---------|
| PD/ $\text{GeI}_2$ coating/perovskite  | 0.73         | 31.94                          | 62.19  | 14.44   |
| ANO/ $\text{GeI}_2$ coating/perovskite | 0.86         | 33.33                          | 75.48  | 21.52   |

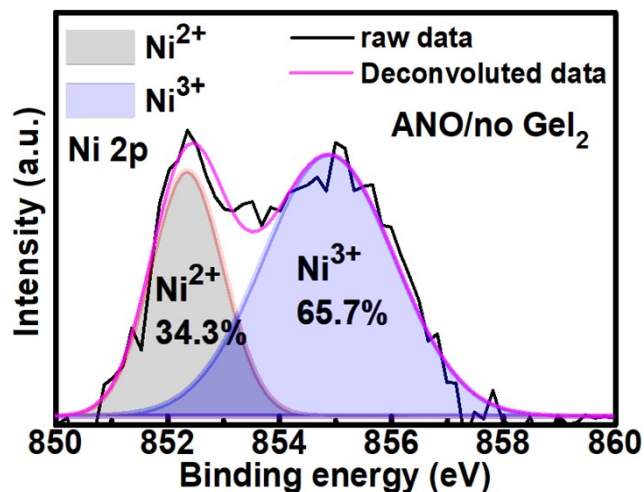

Fig. S22 Ni 2p XPS spectra of bottom surface for no GeI<sub>2</sub> Sn-Pb perovskite film on ANO.

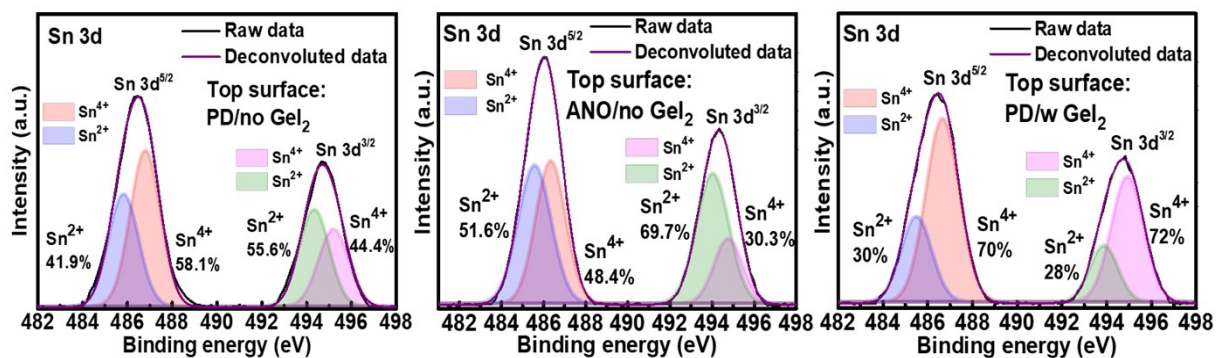

Fig. S23 Sn 3d XPS spectra for top surface of PD/no GeI<sub>2</sub>, ANO/no GeI<sub>2</sub>, and PD/with GeI<sub>2</sub> Sn-Pb perovskite films.

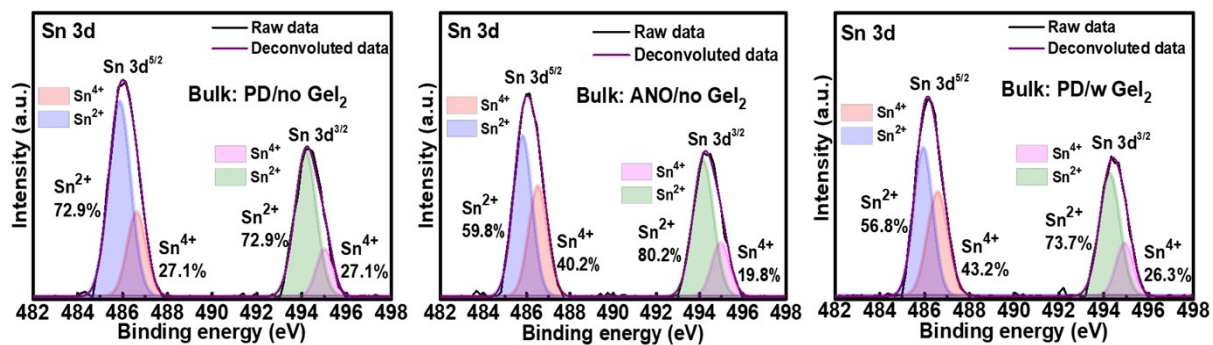

**Fig. S24** Sn 3d XPS spectra for bulk of PD/no GeI<sub>2</sub>, ANO/no GeI<sub>2</sub>, and PD/with GeI<sub>2</sub> Sn-Pb perovskite films.

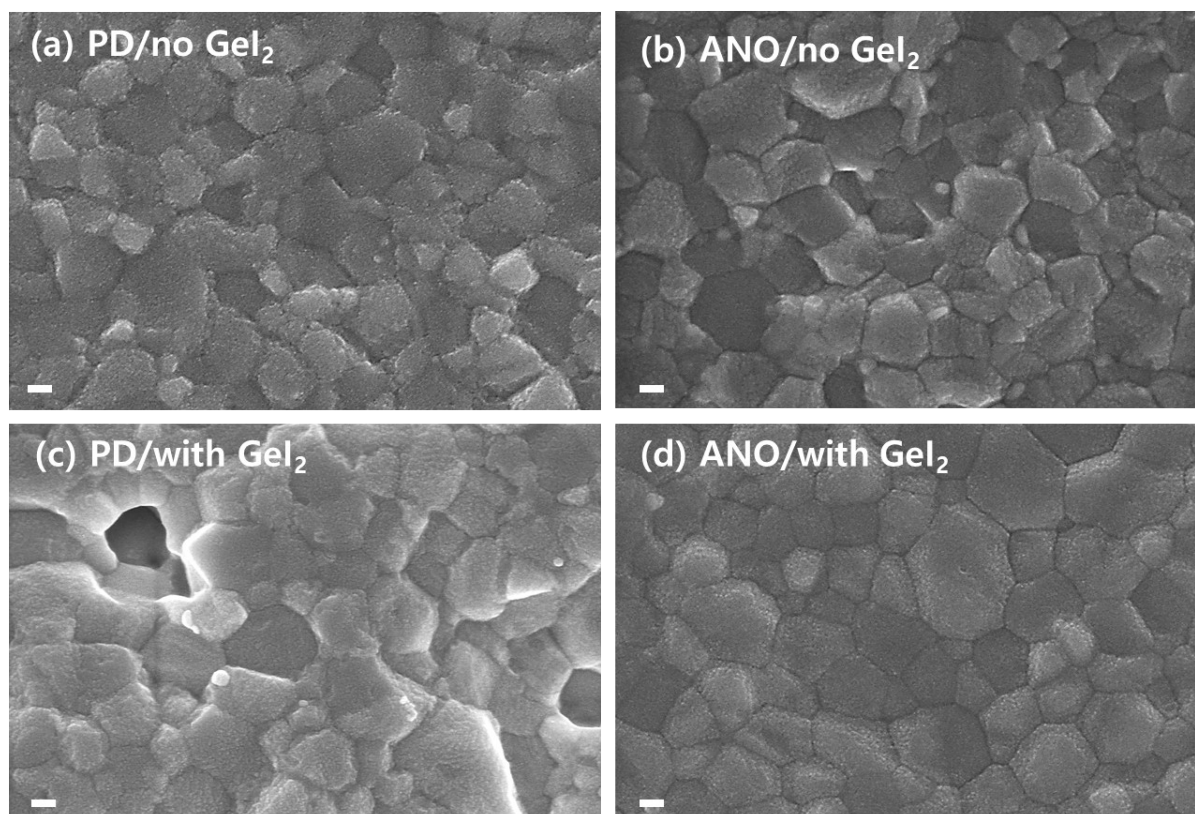

**Fig. S25** FE-SEM morphology images of perovskite films of (a) PD/no GeI<sub>2</sub>, (b) ANO/no GeI<sub>2</sub>, (c) PD/with GeI<sub>2</sub>, and (d) ANO/with GeI<sub>2</sub>. Scale bar: 100 nm.



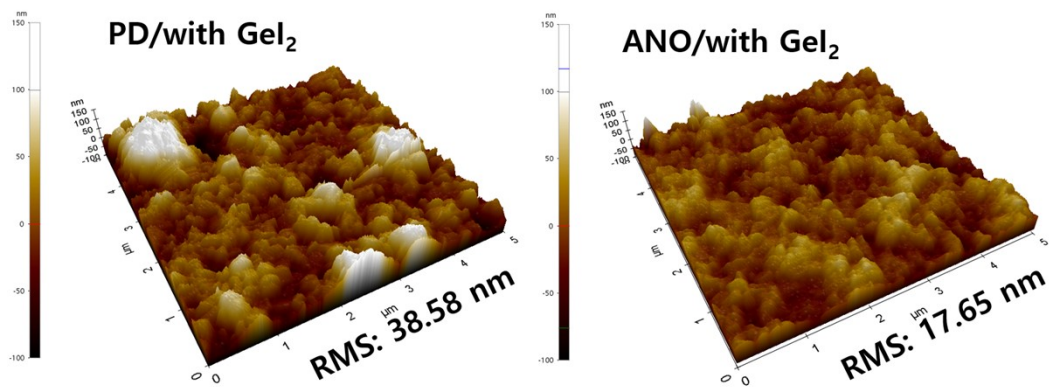

**Fig. S26** AFM 3D images showing the surface roughness of PD/with  $\text{GeI}_2$  and ANO/with  $\text{GeI}_2$  films.

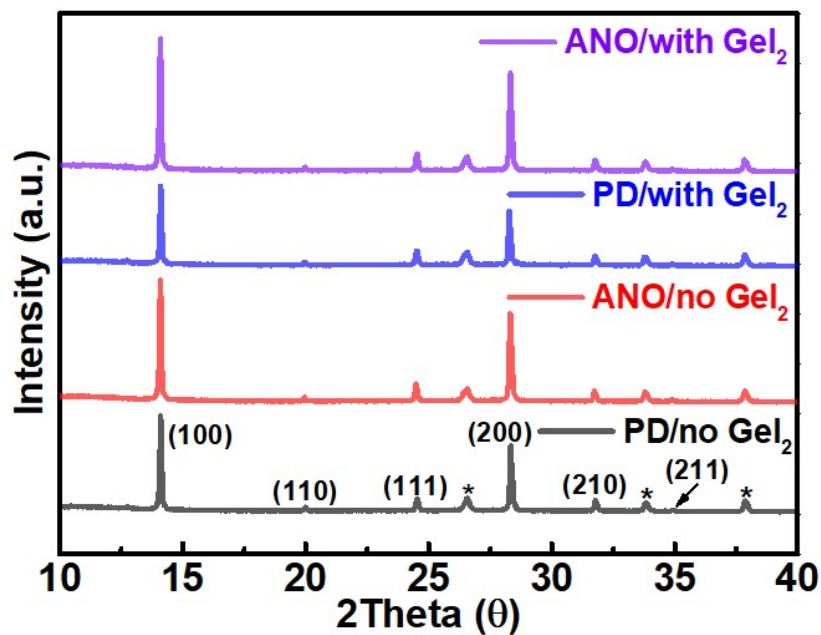

**Fig. S27** XRD patterns for the Sn-Pb perovskite films with suggested conditions (PD/no  $\text{GeI}_2$ , ANO/no  $\text{GeI}_2$ , PD/with  $\text{GeI}_2$ , and ANO/with  $\text{GeI}_2$ ). \* Marks are FTO peaks.

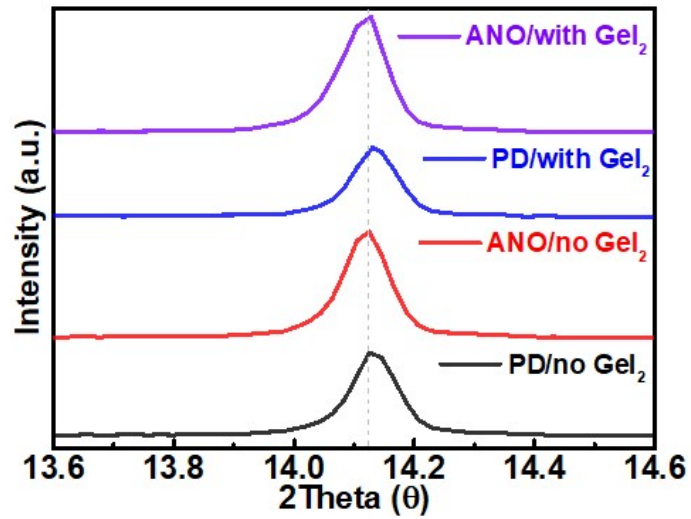

**Fig. S28** The magnified XRD patterns for main perovskite peaks of PD/no  $\text{GeI}_2$ , ANO/no  $\text{GeI}_2$ , PD/with  $\text{GeI}_2$  and ANO/with  $\text{GeI}_2$ .

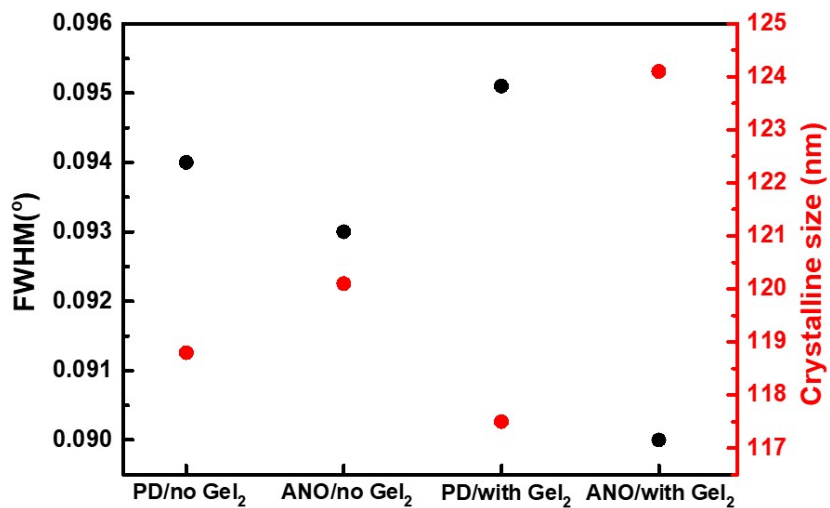

**Fig. S29** FWHM values (left axis) and calculated crystalline sizes (right axis) from the (100) lattice plane.

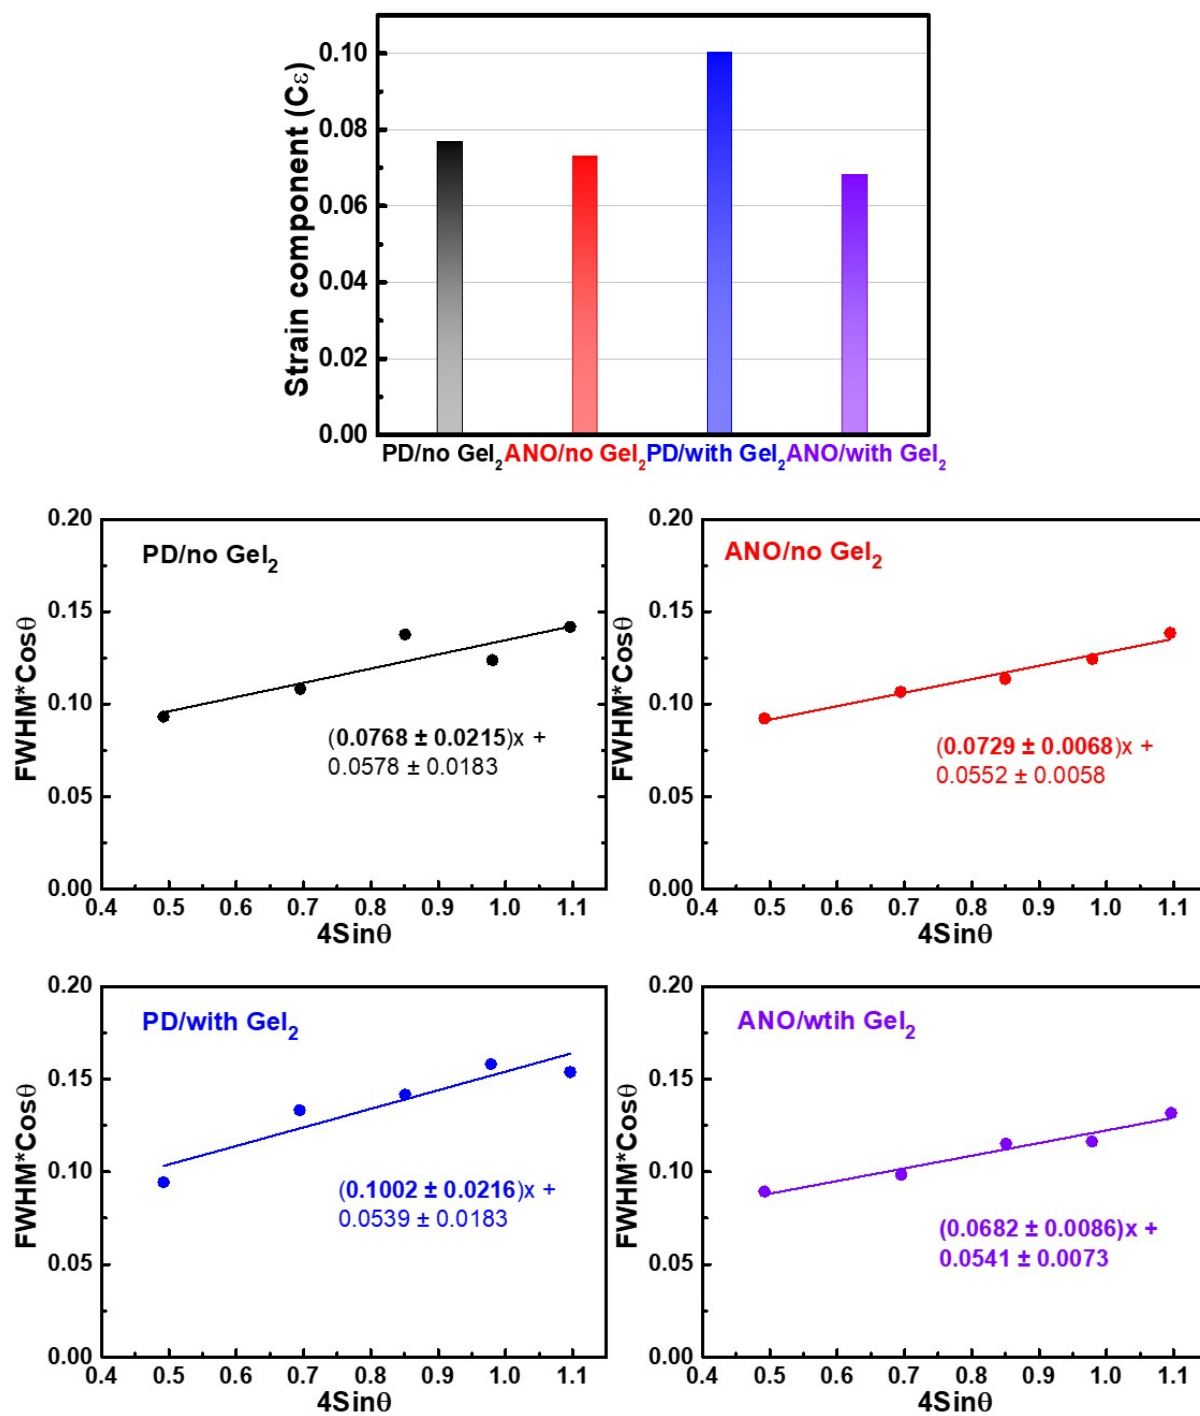

**Fig. S30** Change of strain component ( $C_\epsilon$ ) of perovskite films fabricated on different HTLs (PD and ANO) and without or with  $GeI_2$  additive. Williamson-Hall plots to determine the strain component ( $C_\epsilon$ ) in the Sn-Pb perovskite films with PD/no  $GeI_2$ , ANO/no  $GeI_2$ , PD/with  $GeI_2$ , and ANO/with  $GeI_2$  conditions.

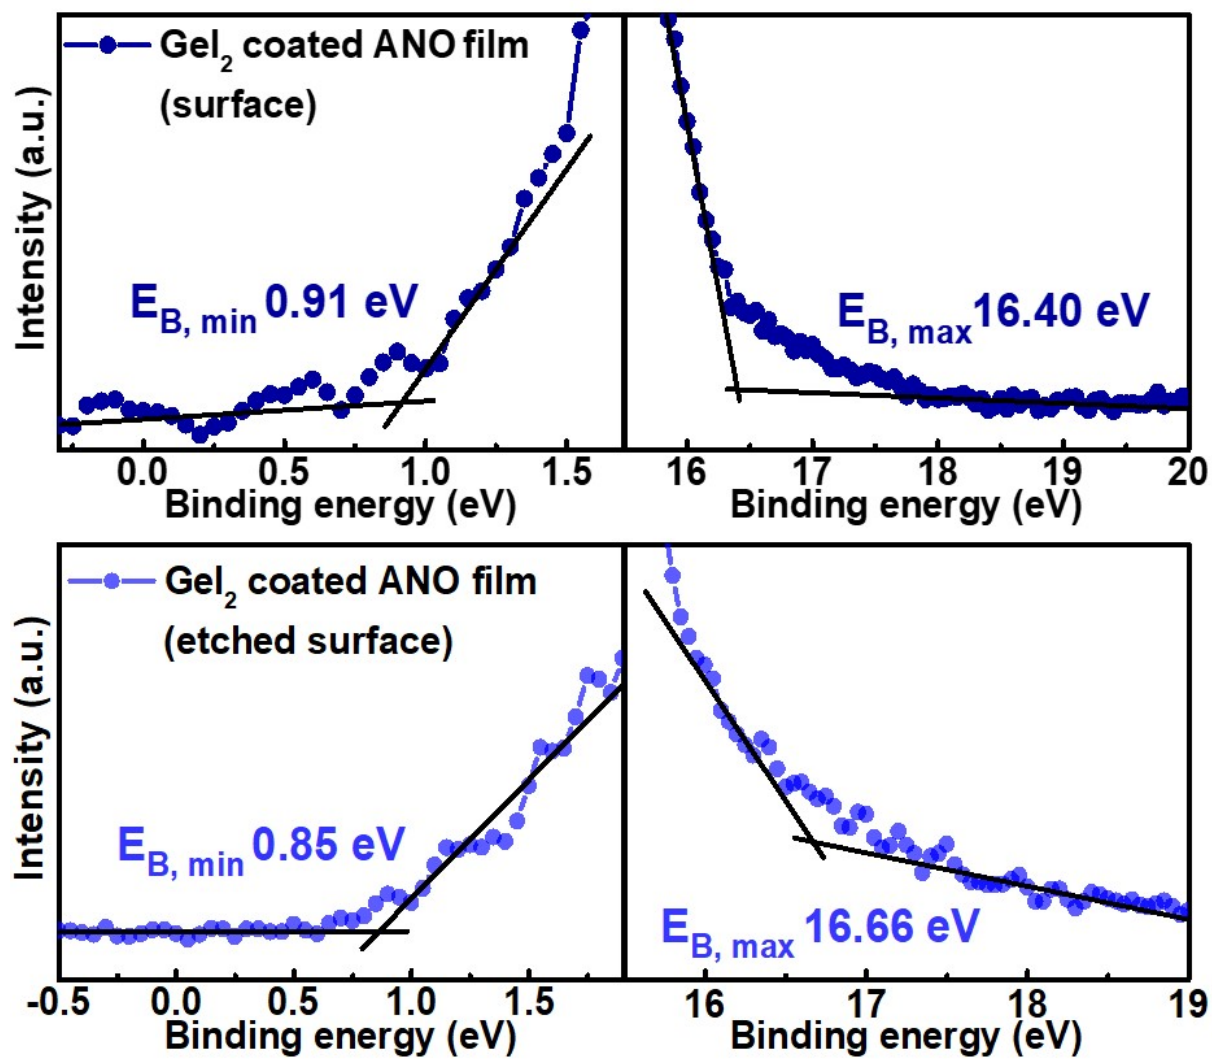

Fig. S31 UPS spectra of secondary electron cutoff and valence band of  $\text{GeI}_2$ -coated ANO films without etching and with etching.

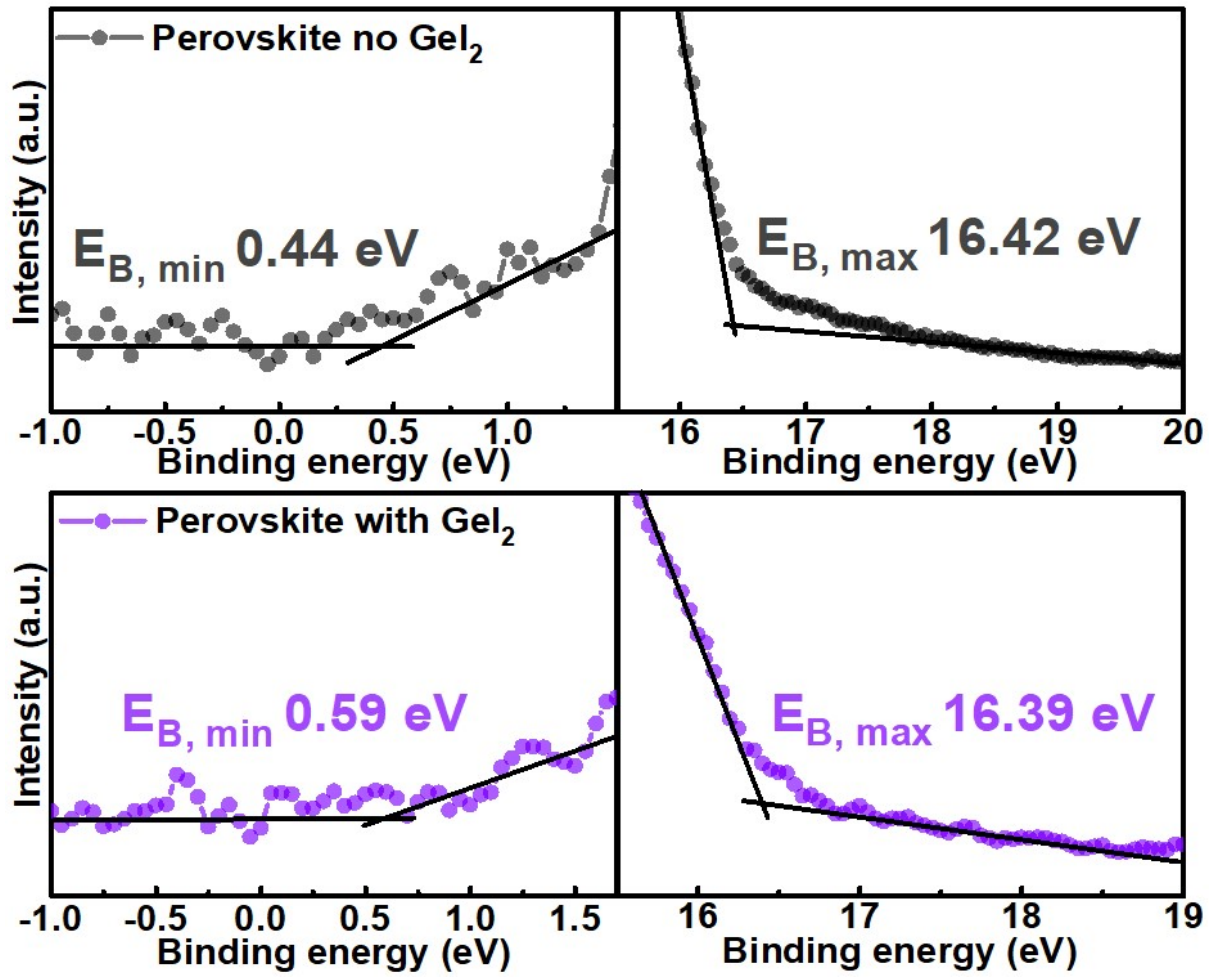

Fig. S32 UPS spectra of secondary electron cutoff and valence band of control no GeI<sub>2</sub> perovskite and with GeI<sub>2</sub> perovskite films.

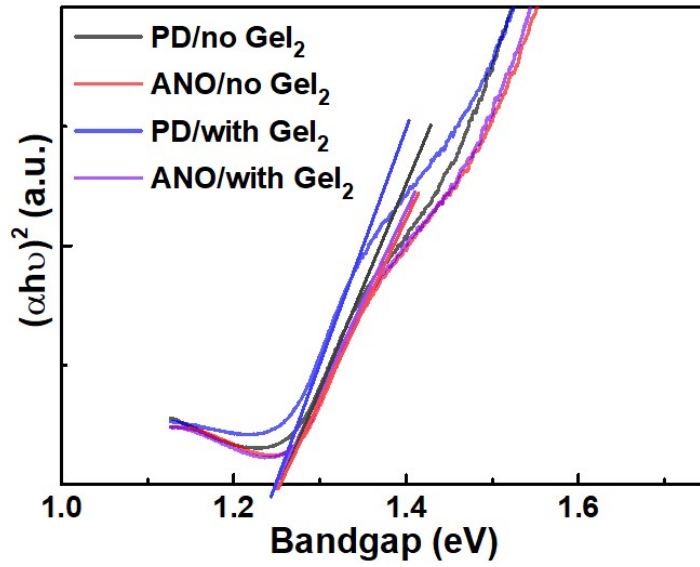

**Fig. S33** Tauc plots of the perovskite films with PD/no  $\text{GeI}_2$ , ANO/no  $\text{GeI}_2$ , PD/with  $\text{GeI}_2$ , and ANO/with  $\text{GeI}_2$  conditions. The bandgap of MA-free Sn-Pb perovskite is 1.25 eV.

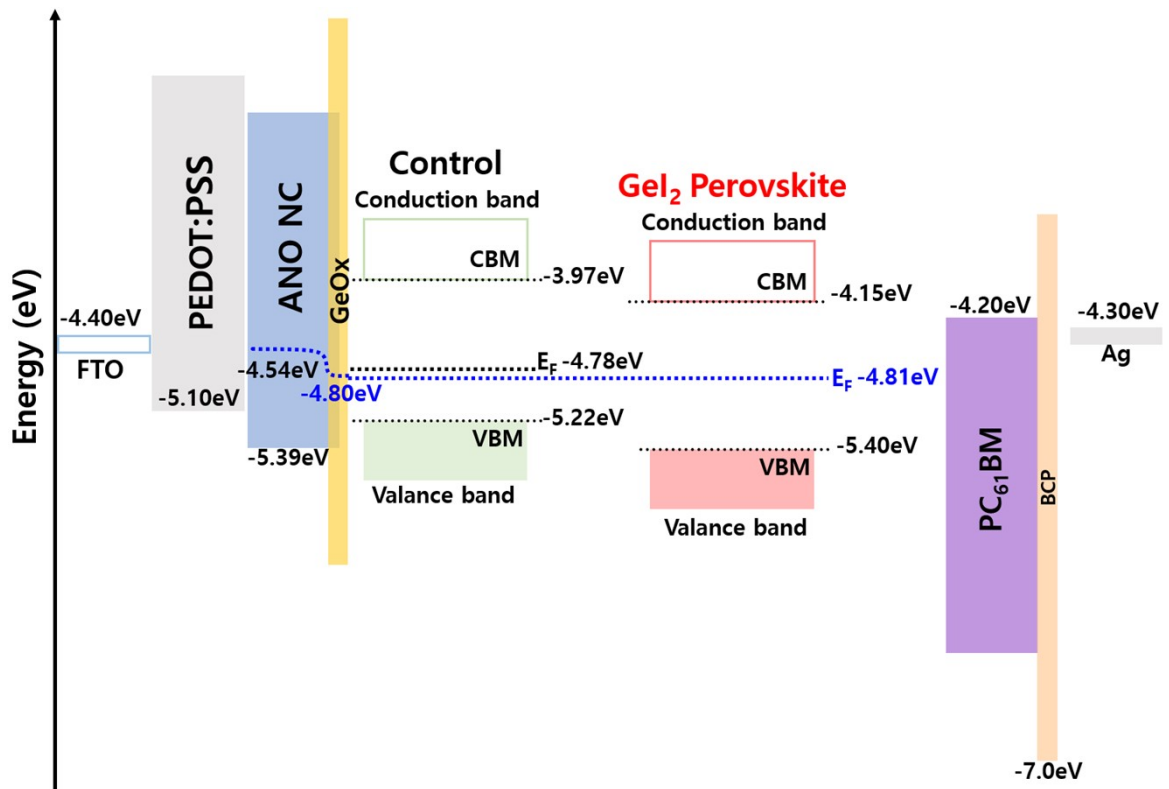

**Fig. S34** Energy band diagram of the fabricated MA-free Sn-Pb PSCs.

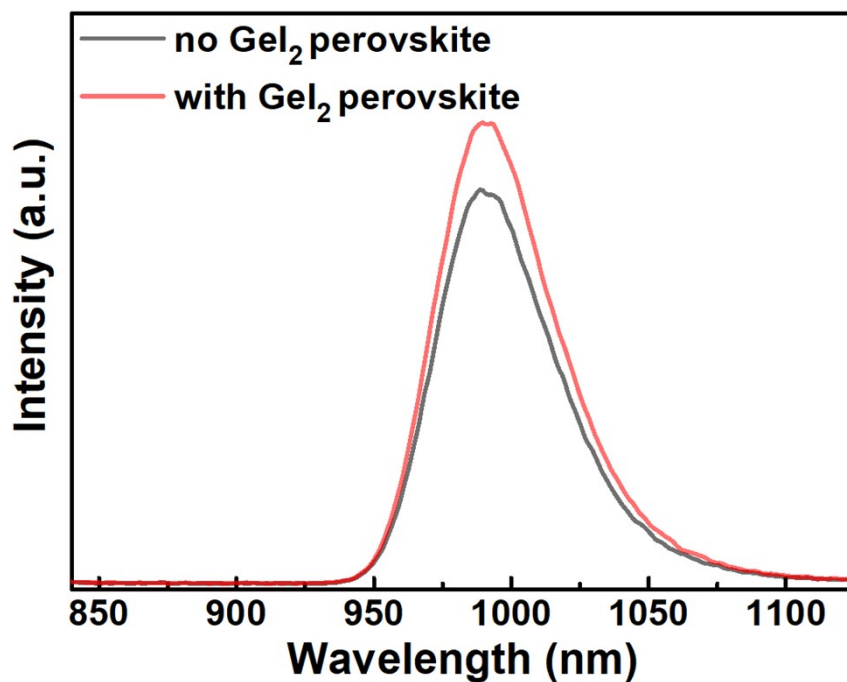

**Fig. S35** Steady-state photoluminescence (SS-PL) spectra of bare glass/perovskite films of no  $\text{GeI}_2$  and with  $\text{GeI}_2$  conditions.

**Table S6.** TR-PL decay obtained after fitting for bare glass/perovskite films with no  $\text{GeI}_2$  and with  $\text{GeI}_2$  shown in Fig. S35.

|                     | $\tau_1$ (ns) | $\tau_2$ (ns) | $\tau_{\text{avg}}$ (ns) |
|---------------------|---------------|---------------|--------------------------|
| no $\text{GeI}_2$   | 136.31        | 605.89        | 341.18                   |
| with $\text{GeI}_2$ | 147.87        | 764.92        | 482.13                   |

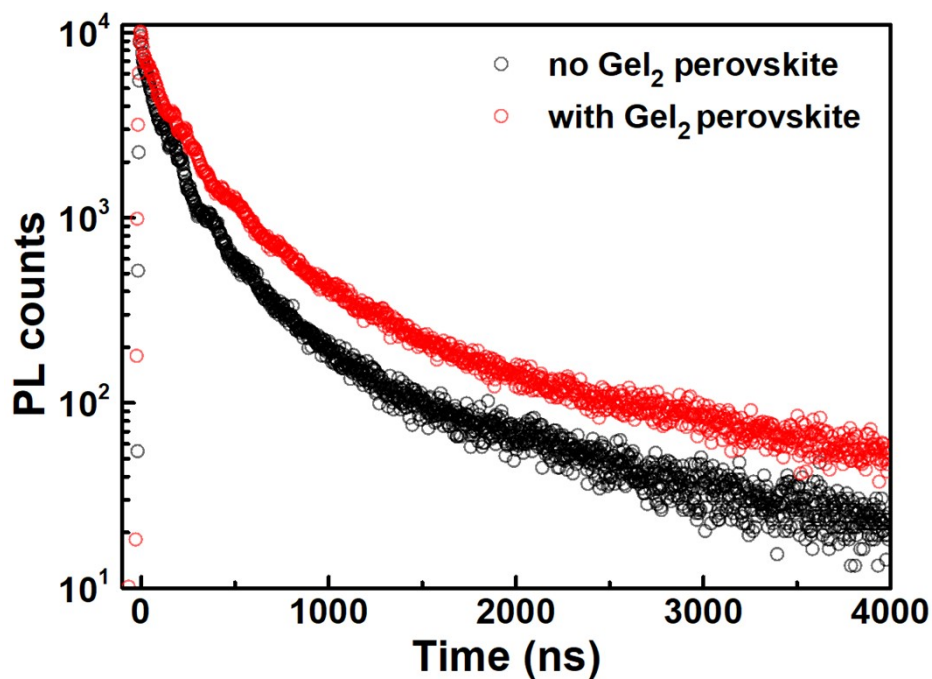

**Fig. S36** Time-resolved photoluminescence (TR-PL) spectra of bare glass/perovskite films with no GeI<sub>2</sub> and with GeI<sub>2</sub>.

**Table S7.** TR-PL decay obtained after fitting for PD/no GeI<sub>2</sub>, ANO/no GeI<sub>2</sub>, PD/with GeI<sub>2</sub>, and ANO/with GeI<sub>2</sub> perovskite films shown in Fig. S36.

|                           | $\tau_1$ (ns) | $\tau_2$ (ns) | $\tau_{\text{avg}}$ (ns) |
|---------------------------|---------------|---------------|--------------------------|
| PD/no GeI <sub>2</sub>    | 14.06         | 344.91        | 39.04                    |
| ANO/no GeI <sub>2</sub>   | 17.92         | 424.18        | 51.37                    |
| PD/with GeI <sub>2</sub>  | 38.41         | 326.34        | 115.01                   |
| ANO/with GeI <sub>2</sub> | 10.23         | 346.80        | 16.32                    |



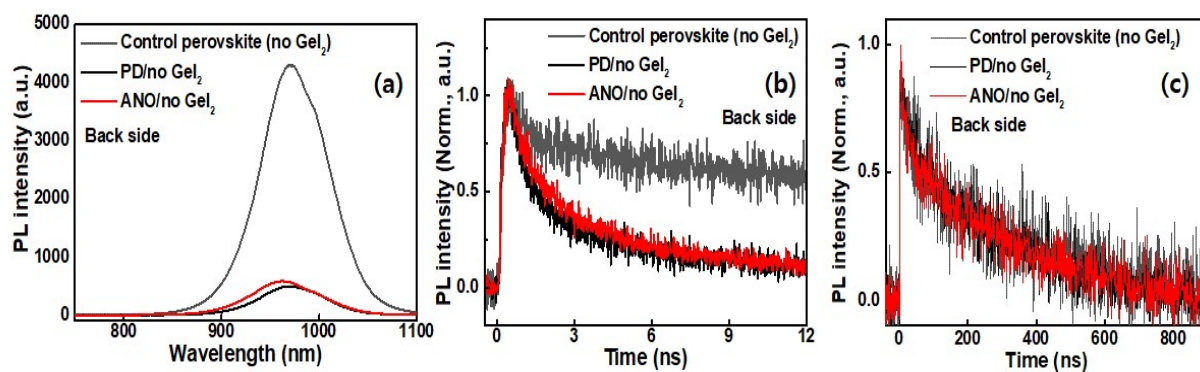

**Fig. S37** PL analysis for back side (glass side) of glass/PEDOT:PSS (PD) or ANO/control perovskite no  $\text{GeI}_2$  (a) SS-PL spectra of glass/control perovskite no  $\text{GeI}_2$ , glass/PD/control perovskite no  $\text{GeI}_2$  and glass/ANO/control perovskite no  $\text{GeI}_2$ . (b) TR-PL spectra of glass/control perovskite no  $\text{GeI}_2$ , glass/PD/control perovskite no  $\text{GeI}_2$  and glass/ANO/control perovskite no  $\text{GeI}_2$  with 12 ns time window. (c) TR-PL spectra of glass/control perovskite no  $\text{GeI}_2$ , glass/PD/control perovskite no  $\text{GeI}_2$  and glass/ANO/control perovskite no  $\text{GeI}_2$  with 1000 ns time window.

**Table S8.** TR-PL decay obtained after fitting for back side of glass/PD or ANO/no  $\text{GeI}_2$  perovskite films with 12 ns and 1000 ns time windows in Fig. S37

|                                         | Fitted time constants (ns) |           |          |
|-----------------------------------------|----------------------------|-----------|----------|
|                                         | $\tau_1$                   | $\tau_2$  | $\tau_3$ |
| Control perovskite (no $\text{GeI}_2$ ) | 3.0 (40%)                  | 400 (60%) |          |
| PD/no $\text{GeI}_2$                    | 1.7 (59%)                  | 3.0 (34%) | 400 (7%) |
| ANO/no $\text{GeI}_2$                   | 2.1 (47%)                  | 3.5 (44%) | 400 (9%) |

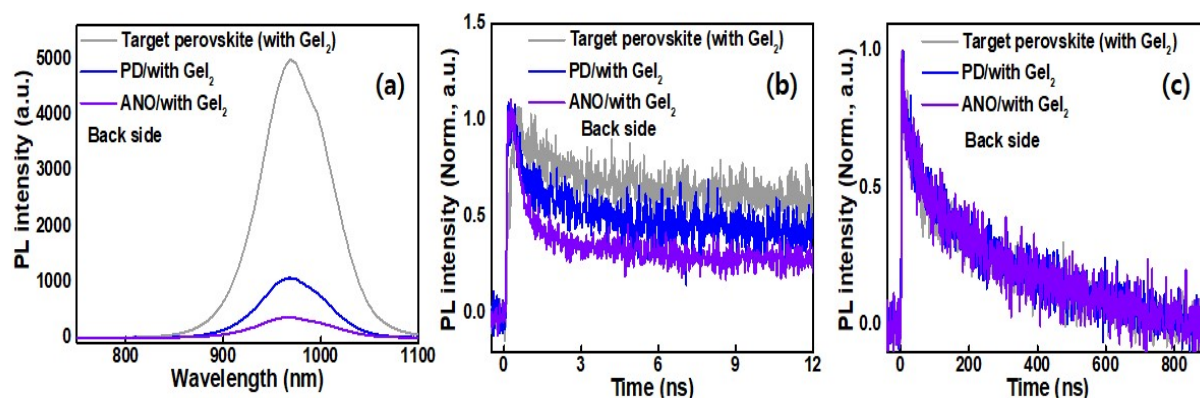

**Fig. S38** PL analysis for back side (glass side) of glass/PEDOT:PSS (PD) or ANO/target perovskite with  $\text{GeI}_2$  (a) SS-PL spectra of glass/target perovskite with  $\text{GeI}_2$ , glass/PD/target perovskite with  $\text{GeI}_2$  and glass/ANO/target perovskite with  $\text{GeI}_2$ . (b) TR-PL spectra of glass/target perovskite with  $\text{GeI}_2$ , glass/PD/target perovskite with  $\text{GeI}_2$  and glass/ANO/target perovskite with  $\text{GeI}_2$  with 12 ns time window. (c) TR-PL spectra of glass/target perovskite with  $\text{GeI}_2$ , glass/PD/target perovskite with  $\text{GeI}_2$  and glass/ANO/target perovskite with  $\text{GeI}_2$  with 1000 ns time window.

**Table S9.** TR-PL decay obtained after fitting for back side of glass/PD or ANO/with  $\text{GeI}_2$  perovskite films with 12 ns and 1000 ns time windows in Fig. S38

|                                          | Fitted time constants (ns) |           |           |
|------------------------------------------|----------------------------|-----------|-----------|
|                                          | $\tau_1$                   | $\tau_2$  | $\tau_3$  |
| Target perovskite (with $\text{GeI}_2$ ) | 4.0 (37%)                  | 400 (63%) |           |
| PD/with $\text{GeI}_2$                   | 1.4 (52%)                  | 4.0 (10%) | 400 (38%) |
| ANO/with $\text{GeI}_2$                  | 1.2 (76%)                  | 400 (24%) |           |

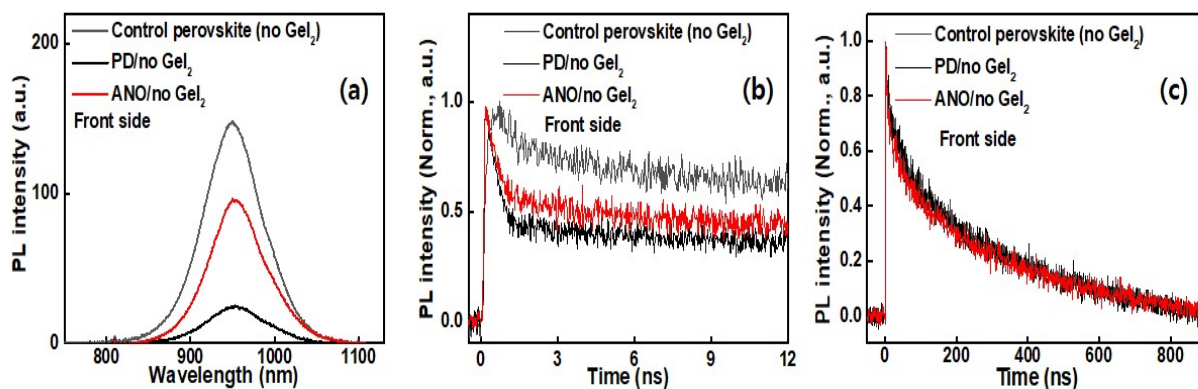

**Fig. S39** PL analysis for front side (perovskite side) of glass/PEDOT:PSS (PD) or ANO/control perovskite no  $\text{GeI}_2$  (a) SS-PL spectra of glass/control perovskite no  $\text{GeI}_2$ , glass/PD/control perovskite no  $\text{GeI}_2$  and glass/ANO/control perovskite no  $\text{GeI}_2$ . (b) TR-PL spectra of glass/ANO/control perovskite no  $\text{GeI}_2$ , glass/PD/control perovskite no  $\text{GeI}_2$  and glass/ANO/control perovskite no  $\text{GeI}_2$  with 12 ns time window. (c) TR-PL spectra of glass/control perovskite no  $\text{GeI}_2$ , glass/PD/control perovskite no  $\text{GeI}_2$  and glass/ANO/control perovskite no  $\text{GeI}_2$  with 1000 ns time window.

**Table S10.** TR-PL decay obtained after fitting for front side of glass/PD or ANO/no  $\text{GeI}_2$  perovskite films with 12 ns and 1000 ns time windows in Fig. S39

|                                         | Fitted decay times (ns) |           |           |
|-----------------------------------------|-------------------------|-----------|-----------|
|                                         | $\tau_1$                | $\tau_2$  | $\tau_3$  |
| Control perovskite (no $\text{GeI}_2$ ) | 3.0 (37%)               | 400 (63%) |           |
| PD/no $\text{GeI}_2$                    | 0.9 (70%)               | 3.0 (4%)  | 400 (26%) |
| ANO/no $\text{GeI}_2$                   | 1.2 (64%)               | 3.5 (11%) | 400 (25%) |

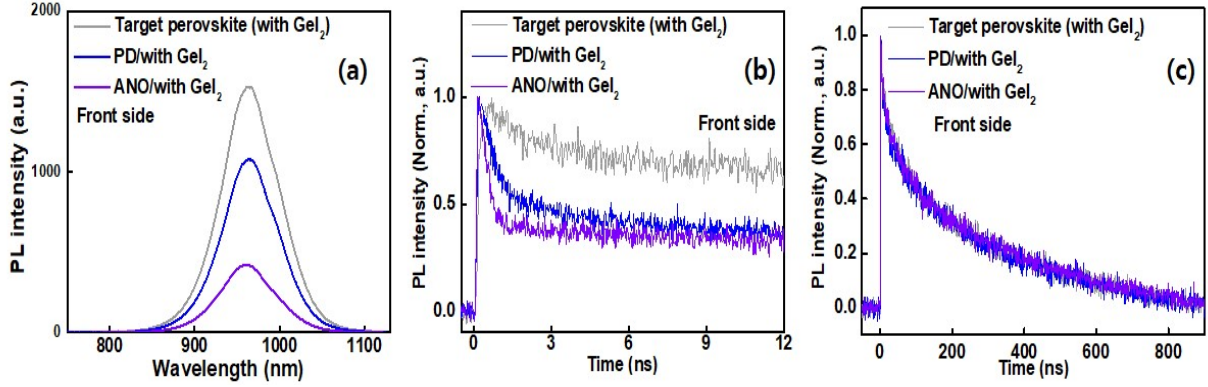

**Fig. S40** PL analysis for front side (perovskite side) of glass/PEDOT:PSS (PD) or ANO/target perovskite with  $\text{GeI}_2$  (a) SS-PL spectra of glass/target perovskite with  $\text{GeI}_2$ , glass/PD/target perovskite with  $\text{GeI}_2$  and glass/ANO/target perovskite with  $\text{GeI}_2$ . (b) TR-PL spectra of glass/target perovskite with  $\text{GeI}_2$ , glass/PD/target perovskite with  $\text{GeI}_2$  and glass/ANO/target perovskite with  $\text{GeI}_2$  with 12 ns time window. (c) TR-PL spectra of glass/target perovskite with  $\text{GeI}_2$ , glass/PD/target perovskite with  $\text{GeI}_2$  and glass/ANO/target perovskite with  $\text{GeI}_2$  with 1000 ns time window.

**Table S11.** TR-PL decay obtained after fitting for front side of glass/PD or ANO/with  $\text{GeI}_2$  perovskite films with 12 ns and 1000 ns time windows in Fig. S40

|                                          | Fitted decay times (ns) |           |           |
|------------------------------------------|-------------------------|-----------|-----------|
|                                          | $\tau_1$                | $\tau_2$  | $\tau_3$  |
| Target perovskite (with $\text{GeI}_2$ ) | 4.0 (34%)               | 400 (66%) |           |
| PD/with $\text{GeI}_2$                   | 1.5 (60%)               | 4.0 (10%) | 400 (30%) |
| ANO/with $\text{GeI}_2$                  | 0.8 (73%)               | 4.0 (5%)  | 400 (22%) |

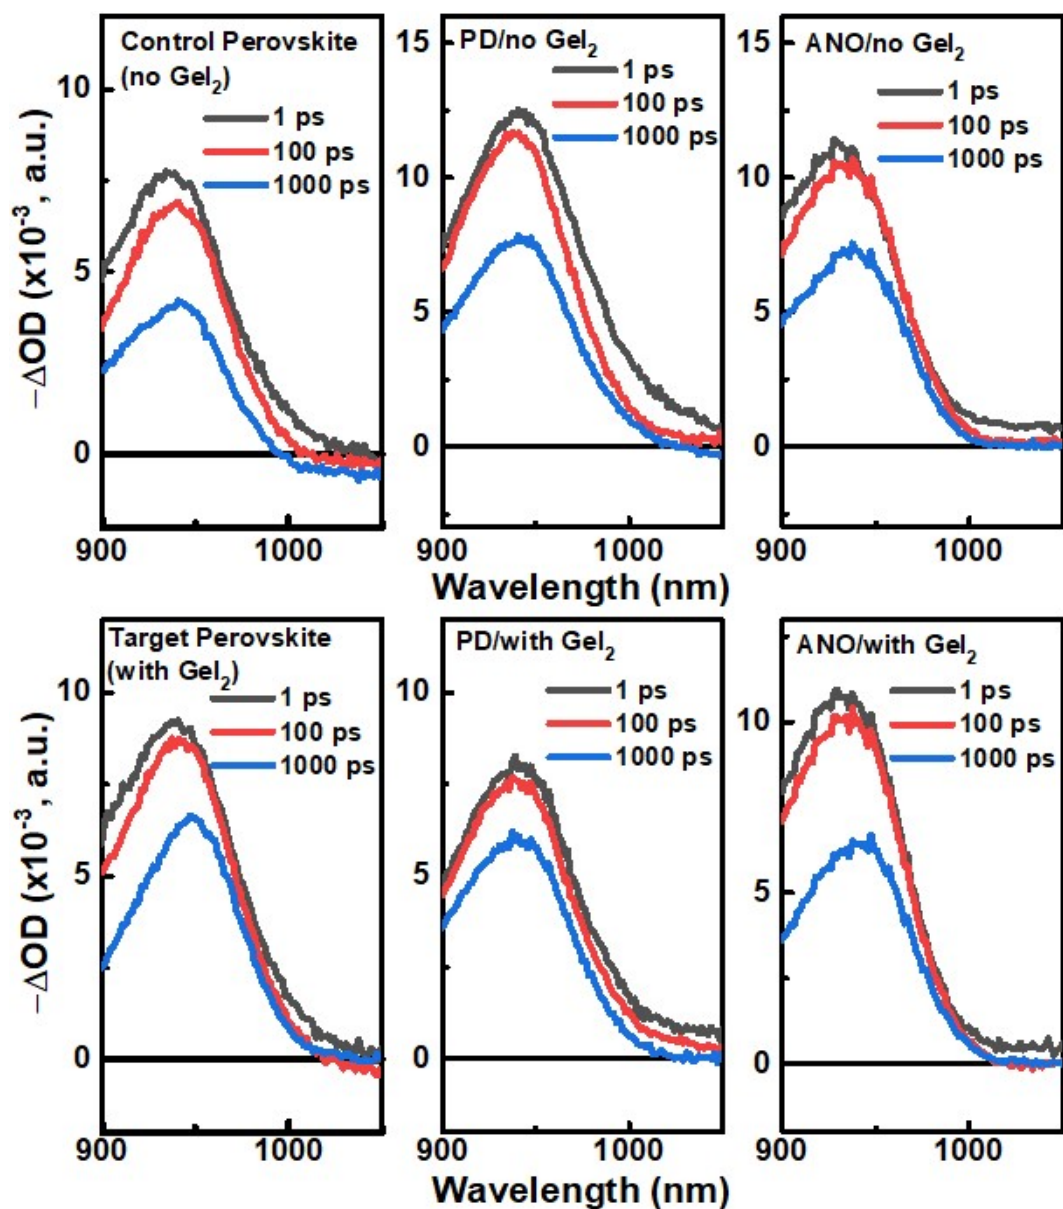

**Fig. S41** Femtosecond-TAS spectra  $\Delta OD$  as a function of wavelength at selected delay times using a photoexcitation wavelength of 400 nm and a pump fluence of  $3 \mu\text{J}/\text{cm}^2$ .

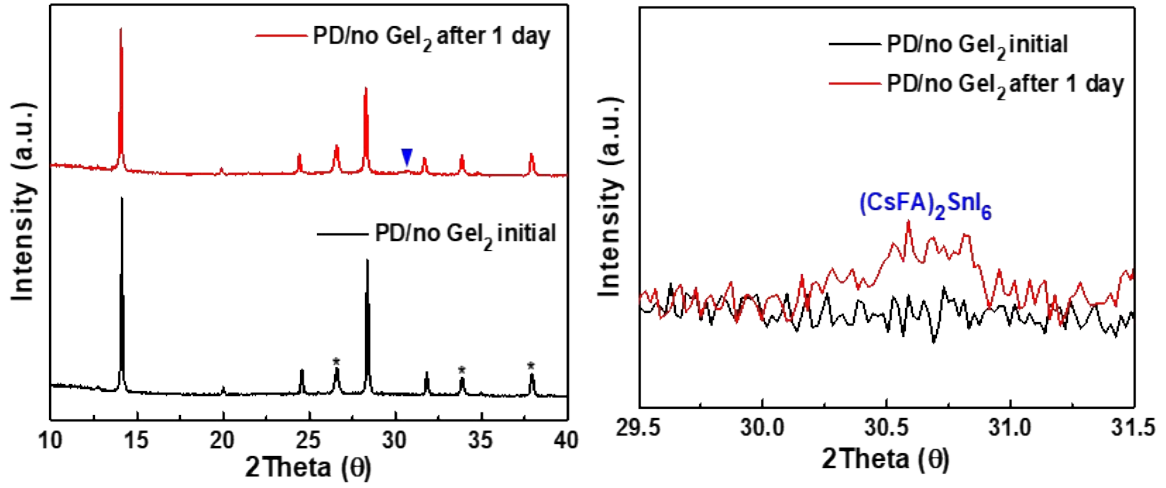

Fig. S42. Time-dependent XRD patterns of PD/no GeI<sub>2</sub> perovskite film.

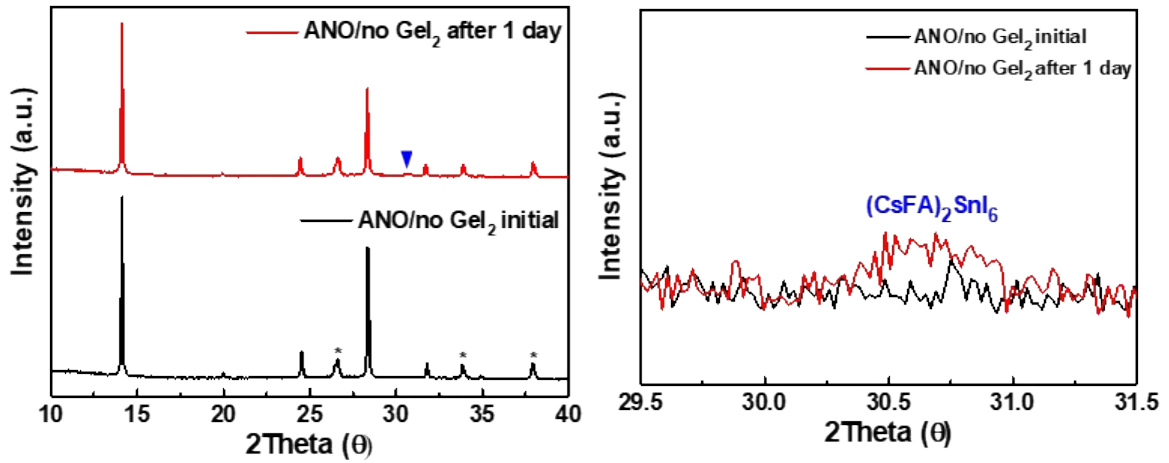

Fig. S43. Time-dependent XRD patterns of ANO/no GeI<sub>2</sub> perovskite film.

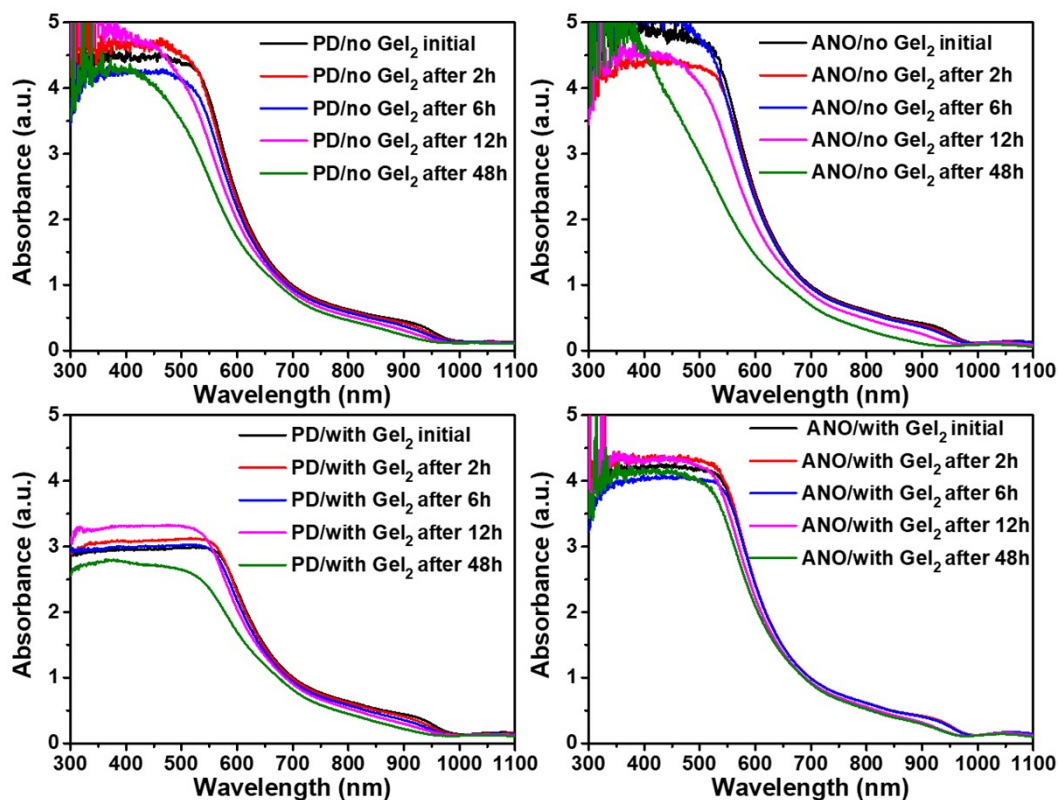

**Fig. S44.** Time-dependent absorption spectra of PD/no GeI<sub>2</sub>, ANO/no GeI<sub>2</sub>, PD/with GeI<sub>2</sub>, and ANO/with GeI<sub>2</sub> fabricated on FTO.

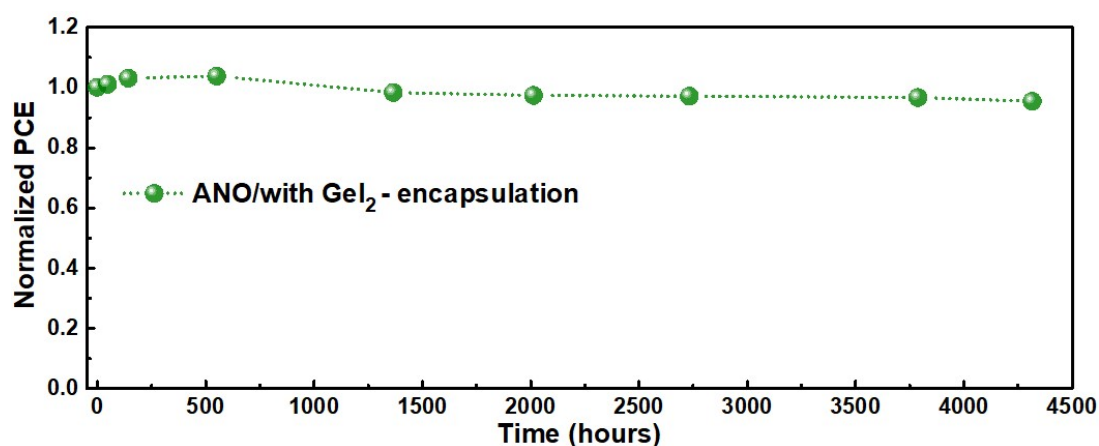

**Fig. S45.** Long-term stability of the MA-free Sn-Pb PSCs of ANO/with GeI<sub>2</sub> condition with encapsulation.

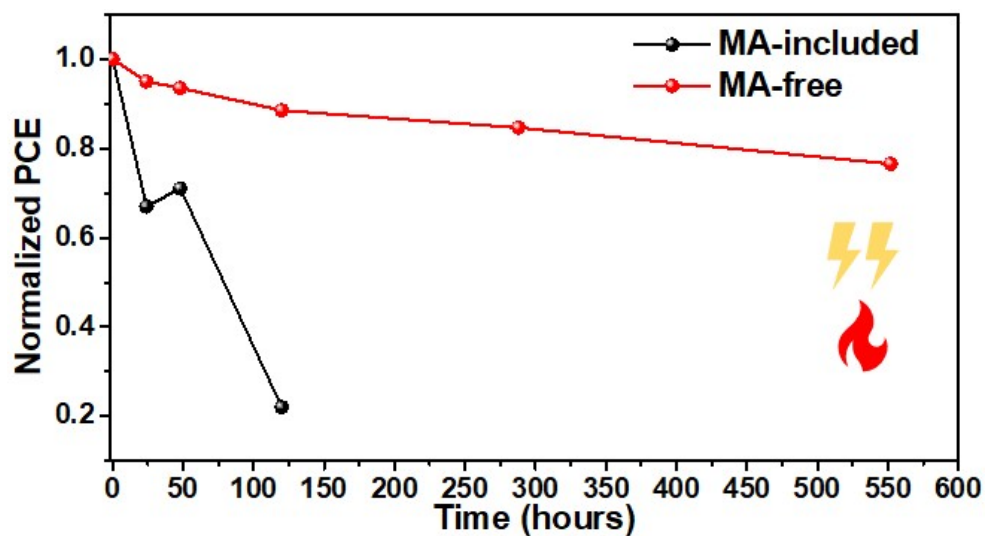

**Fig. S46** The normalized light-thermal stability of the MA-included and MA-free Sn-Pb perovskite solar cells under 55 °C and 100 mW/cm<sup>2</sup> illumination of LED simulator.

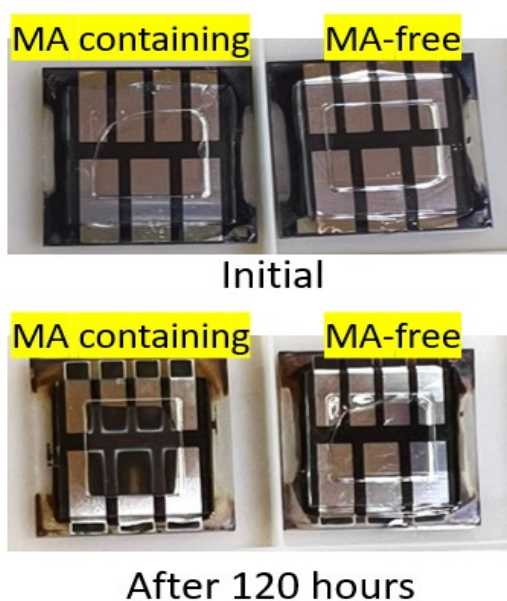

**Fig. S47** Photographs of MA-containing Sn-Pb PSC and MA-free Sn-Pb PSC with initial and after 120 hours



## References

1. S. Shao, Y. Cui, H. Duim, X. Qiu, J. Dong, G. H. Ten Brink, G. Portale, R. C. Chiechi, S. Zhang, J. Hou and M. A. Loi, *Adv. Mater.*, 2018, **30**, 1803703.
2. D. Chi, S. Huang, M. Zhang, S. Mu, Y. Zhao, Y. Chen and J. You, *Adv. Funct. Mater.*, 2018, **28**, 1804603.
3. J. Werner, T. Moot, T. A. Gossett, I. E. Gould, A. F. Palmstrom, E. J. Wolf, C. C. Boyd, M. F. van Hest, J. M. Luther, J. J. Berry and M. D. McGehee, *ACS Energy Lett.*, 2020, **5**, 1215-1223.
4. W. Zhang, X. Li, S. Fu, X. Zhao, X. Feng and J. Fang, *Joule*, 2021, **5**, 2904-2914.
5. H. Guo, H. Zhang, S. Liu, D. Zhang, Y. Wu and W.-H. Zhu, *ACS Appl. Mater. Interfaces*, 2022, **14**, 6852-6858.
6. Z. Yu, J. Wang, B. Chen, M. A. Uddin, Z. Ni, G. Yang and J. Huang, *Adv. Mater.*, 2022, **34**, 2205769.
7. J. Wang, Z. Yu, D. D. Astridge, Z. Ni, L. Zhao, B. Chen, M. Wang, Y. Zhou, G. Yang, X. Dai, A. Sellinger and J. Huang, *ACS Energy Lett.*, 2022, **7**, 3353-3361.
8. M. Pitaro, J. E. S. Alonso, L. Di Mario, D. G. Romero, K. Tran, J. Kardula, T. Zaharia, M. B. Johansson, E. M. Johansson, R. C. Chiechi and M. A. Loi, *Adv. Funct. Mater.*, 2023, 2306571.
9. M. Pitaro, J. S. Alonso, L. Di Mario, D. G. Romero, K. Tran, T. Zaharia, M. B. Johansson, E. M. Johansson and M. A. Loi, *J. Mater. Chem. A*, 2023, **11**, 11755-11766.
10. Y. Zhou, Z. Wang, J. Jin, X. Zhang, J. Zou, F. Yao, Z. Zhu, X. Cui, D. Zhang, Y. Yu, C. Chen, D. Zhao, Q. Cao, Q. Lin and Q. Tai, *Angew. Chem. Int. Edit.*, 2023, **135**, e202300759.
